# Supplementary material for: New Oxazolo[5,4-d]pyrimidines as Potential Anticancer Agents: Their Design, Synthesis, and In Vitro Biological Activity Research
Source: MDPI journal article supplement (doi:10.3390/ijms231911694), 2022-10-02
Supplement: s1 [file s1]

## SUPPLEMENTARY MATERIAL

### **New Oxazolo[5,4-*d*]pyrimidines as Potential Anticancer Agents: Their Design, Synthesis and *In Vitro* Biological Activity Research**

**Aleksandra Sochacka-Ćwikła<sup>1,\*</sup>, Marcin Mączyński<sup>1,\*</sup>, Żaneta Czyżnikowska<sup>2</sup>, Benita Wiatrak<sup>3</sup>, Izabela Jęskowiak<sup>3</sup>, Albert Czerski<sup>4</sup>, and Andrzej Regiec<sup>1</sup>**

<sup>1</sup> Department of Organic Chemistry and Drug Technology, Faculty of Pharmacy, Wrocław Medical University, 211A Borowska Street, 50-556 Wrocław, Poland

<sup>2</sup> Department of Inorganic Chemistry, Faculty of Pharmacy, Wrocław Medical University, 211A Borowska Street, 50-556 Wrocław, Poland

<sup>3</sup> Department of Pharmacology, Faculty of Medicine, Wrocław Medical University, 2 Mikulicza-Radeckiego Street, 50-345 Wrocław, Poland

<sup>4</sup> Department of Biostructure and Animal Physiology, Wrocław University of Environmental and Life Sciences, 25/27 Norwida Street, 50-375 Wrocław, Poland

\*Corresponding authors: [aleksandra.sochacka-cwikla@umw.edu.pl](mailto:aleksandra.sochacka-cwikla@umw.edu.pl) (ASC); Tel.: +48 717840634; [marcin.maczynski@umw.edu.pl](mailto:marcin.maczynski@umw.edu.pl) (MM); Tel.: +48 717840342

# TABLE OF CONTENTS

|                                                                                                                                          |    |
|------------------------------------------------------------------------------------------------------------------------------------------|----|
| <b>CHEMISTRY</b> .....                                                                                                                   | 3  |
| Electrospray Ionization Mass Spectrometry (ESI-MS) measurements of intermediate (2), and oxazolo[5,4- <i>d</i> ]pyrimidines (3a-j) ..... | 3  |
| Analysis and Visualizations of Electrospray Ionization Mass Spectrometry (ESI-MS) spectra of intermediate 2.....                         | 3  |
| Analysis and Visualizations of High Resolution Electrospray Ionization Mass Spectrometry (HR-ESI-MS) spectra of the compounds 3a-j.....  | 4  |
| Visualizations of Nuclear magnetic resonance (NMR) and Infrared (IR) spectra of intermediate 2 .....                                     | 12 |
| Visualizations of Nuclear magnetic resonance (NMR) and Infrared (IR) spectra of the compound 3a.....                                     | 13 |
| Visualizations of Nuclear magnetic resonance (NMR) and Infrared (IR) spectra of the compound 3b.....                                     | 15 |
| Visualizations of Nuclear magnetic resonance (NMR) and Infrared (IR) spectra of the compound 3c .....                                    | 16 |
| Visualizations of Nuclear magnetic resonance (NMR) and Infrared (IR) spectra of the compound 3d.....                                     | 18 |
| Visualizations of Nuclear magnetic resonance (NMR) and Infrared (IR) spectra of the compound 3e .....                                    | 19 |
| Visualizations of Nuclear magnetic resonance (NMR) and Infrared (IR) spectra of the compound 3f.....                                     | 21 |
| Visualizations of Nuclear magnetic resonance (NMR) and Infrared (IR) spectra of the compound 3g.....                                     | 22 |
| Visualizations of Nuclear magnetic resonance (NMR) and Infrared (IR) spectra of the compound 3h.....                                     | 24 |
| Visualizations of Nuclear magnetic resonance (NMR) and Infrared (IR) spectra of the compound 3i.....                                     | 25 |
| Visualizations of Nuclear magnetic resonance (NMR) and Infrared (IR) spectra of the compound 3j.....                                     | 27 |
| <b>BIOLOGY</b> .....                                                                                                                     | 29 |
| <b>MOLECULAR DOCKING</b> .....                                                                                                           | 31 |
| <b>PHYSICOCHEMICAL PROPERTIES, PHARMACOKINETICS AND ADME ACTIVITY</b> .....                                                              | 33 |

## CHEMISTRY

### Electrospray Ionization Mass Spectrometry (ESI-MS) measurements of intermediate (2), and oxazolo[5,4-*d*]pyrimidines (3a-j)

Electrospray ionization mass spectrometry (ESI-MS) spectra of the all compounds were recorded with the compact<sup>TM</sup> Electrospray Ionisation-Quadrupole-Time of Flight (ESI-Q-TOF) Mass Spectrometer (Bruker Daltonics) in methanol solutions in positive ionization. The samples of the compounds were dissolved in methanol in eppendorf tubes and immediately measured.

Requirements for the high resolution electrospray ionization mass spectrometry (HR-ESI-MS) measurement:

- mass spectrometer resolution must be above 16000, where the resolution, according to the definition recommended by IUPAC for mass spectrometry [1], is expressed with the following formula:

$$Resolution = \frac{M}{\Delta M}$$

Where M – is the value of ion mass to charge relation,  $\Delta M$  – is resolving power (mass) that is the width of the peak measured at 50% fraction of the peak height (i.e. the full width at half maximum (FWHM))

- mass measurement relative error must be below  $|\pm 5|$  ppm (indicating a good mass measurement accuracy). Relative error, which was expressed in ppm (parts per million), was calculated on the basis of the following formula:

$$RelError[ppm] = \left| \frac{Calculated\ m/z - Found\ m/z}{Calculated\ m/z} \cdot 10^6 \right|$$

### Analysis and Visualizations of Electrospray Ionization Mass Spectrometry (ESI-MS) spectra of intermediate 2

**Table S1.** Comparative set of masses of quasi-parent molecular  $[M+H]^+$  ion of intermediate 2. Relative error associated with mass measurement of the intermediate 2.

| No. | Calculated m/z for $[M+H]^+$ ion | Found m/z for $[M+H]^+$ ion<br>(percentage relative intensity) | Mass measurement relative error (ppm) |
|-----|----------------------------------|----------------------------------------------------------------|---------------------------------------|
| 2   | 318.1197                         | 318.1237 (100%)                                                | 12.57                                 |

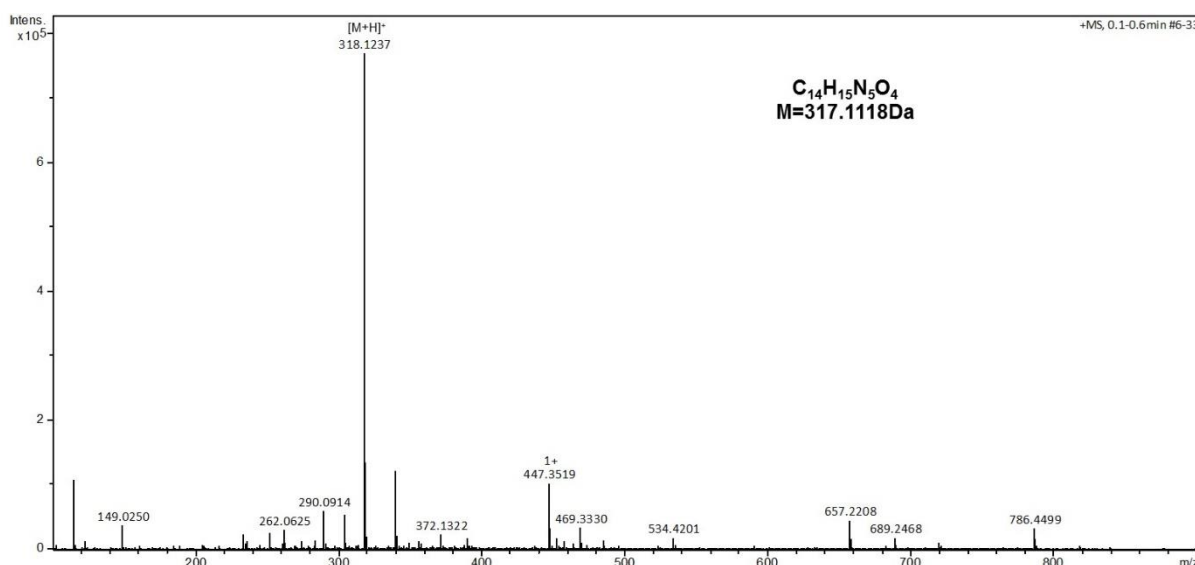

**Figure S1.** ESI-MS spectrum of the compound **2**.

**Table S2.** Analysis of other quasi-parent molecular ions of the compound **2**.

| Other quasi-parent molecular ions of <b>2</b> | Calculated m/z | Found    |                        |
|-----------------------------------------------|----------------|----------|------------------------|
|                                               |                | m/z      | Relative intensity (%) |
| $[M+H-C_2H_4]^+$                              | 290.0884       | 290.0914 | 7.66                   |
| $[M+Na]^+$                                    | 340.1016       | 340.1056 | 15.86                  |
| $[2M+Na]^+$                                   | 657.2140       | 657.2208 | 5.78                   |

## Analysis and Visualizations of High Resolution Electrospray Ionization Mass Spectrometry (HR-ESI-MS) spectra of the compounds **3a-j**

**Table S3.** Comparative set of masses of quasi-parent molecular  $[M+H]^+$  ions of the compounds **3a-j**. Relative errors, resolution and the full width at half maximum (FWHM) associated with mass measurements of the compounds **3a-j**.

| No.       | Calculated m/z for $[M+H]^+$ ion | Found m/z for $[M+H]^+$ ion (percentage relative intensity) | Mass measurement relative error [ppm] | Resolution and FWHM ( $\Delta M$ ) [m/z] |
|-----------|----------------------------------|-------------------------------------------------------------|---------------------------------------|------------------------------------------|
| <b>3a</b> | 247.0938                         | 247.0950 (100%)                                             | 4.86                                  | 20014<br>0.0123                          |
| <b>3b</b> | 261.1096                         | 261.1084 (100%)                                             | 4.60                                  | 20692<br>0.0126                          |
| <b>3c</b> | 275.1251                         | 275.1262 (100%)                                             | 4.00                                  | 21301<br>0.0129                          |
| <b>3d</b> | 289.1408                         | 289.1398 (100%)                                             | 3.17                                  | 19404<br>0.0149                          |
| <b>3e</b> | 303.1564                         | 303.1549 (100%)                                             | 4.95                                  | 22433<br>0.0135                          |

|           |          |                 |      |                 |
|-----------|----------|-----------------|------|-----------------|
| <b>3f</b> | 304.1516 | 304.1527 (100%) | 3.62 | 20688<br>0.0147 |
| <b>3g</b> | 318.1673 | 318.1677 (100%) | 1.26 | 22584<br>0.0141 |
| <b>3h</b> | 277.1044 | 277.1053 (100%) | 3.25 | 21570<br>0.0128 |
| <b>3i</b> | 291.1200 | 291.1214 (100%) | 4.81 | 20639<br>0.0141 |
| <b>3j</b> | 346.1622 | 346.1639 (100%) | 4.91 | 21990<br>0.0157 |

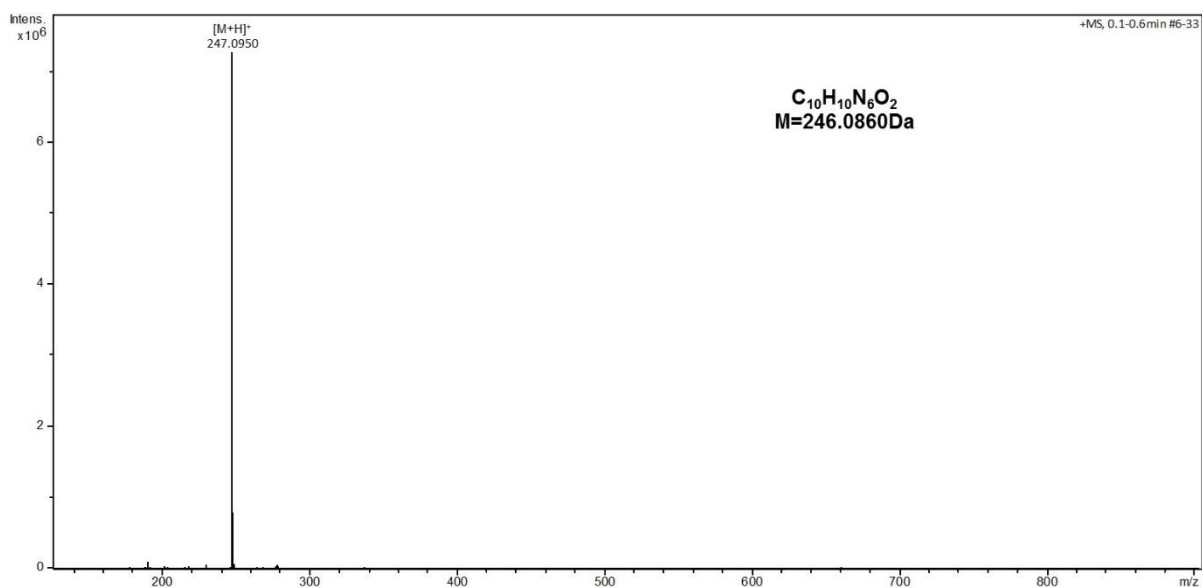

**Figure S2.** HR-ESI-MS spectrum of the compound **3a**.

**Table S4.** Analysis of other quasi-parent molecular ions of the compound **3a**.

| Other quasi-parent molecular ions of <b>3a</b> | Calculated m/z | Found    |                        |
|------------------------------------------------|----------------|----------|------------------------|
|                                                |                | m/z      | Relative intensity (%) |
| $[M+H-NH_3]^+$                                 | 230.0673       | 230.0679 | 0.62                   |
| $[M+Na]^+$                                     | 269.0757       | 269.0763 | 0.24                   |
| $[M+CH_3OH+H]^+$                               | 279.1200       | 279.1225 | 0.49                   |
| $[2M+Na]^+$                                    | 515.1623       | 515.1630 | 0.08                   |

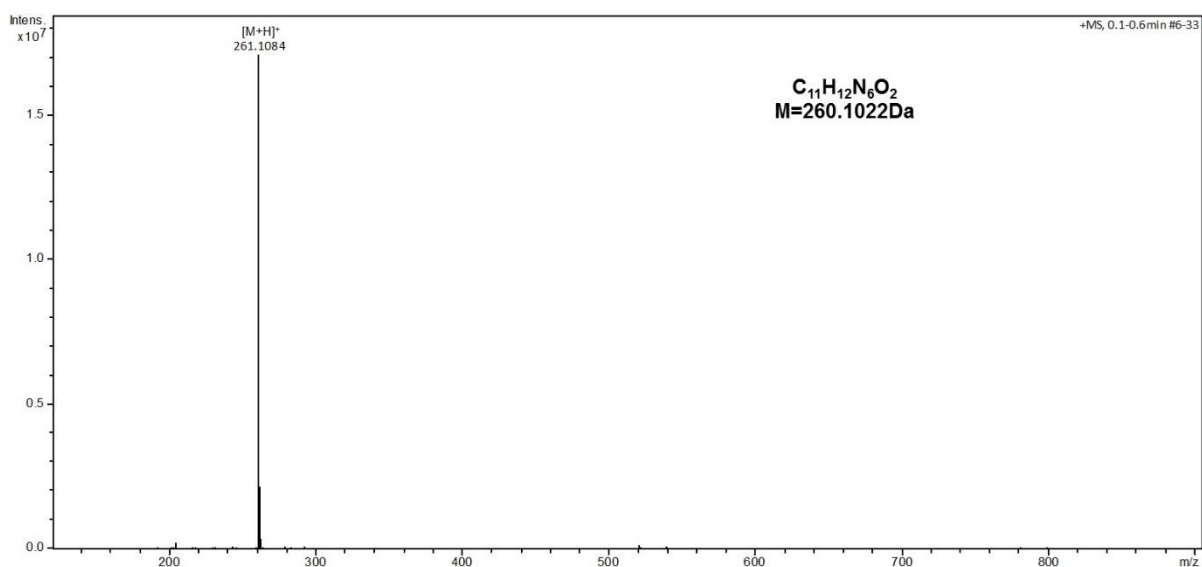

**Figure S3.** HR-ESI-MS spectrum of the compound **3b**.

**Table S5.** Analysis of other quasi-parent molecular ions of the compound **3b**.

| Other quasi-parent molecular ions of <b>3b</b> | Calculated m/z | Found    |                        |
|------------------------------------------------|----------------|----------|------------------------|
|                                                |                | m/z      | Relative intensity (%) |
| $[M+H-NH_3]^+$                                 | 244.0829       | 244.0826 | 0.56                   |
| $[M+Na]^+$                                     | 283.0914       | 283.0905 | 0.15                   |
| $[M+CH_3OH+H]^+$                               | 293.1357       | 293.1349 | 0.57                   |
| $[2M+H]^+$                                     | 521.2116       | 521.2096 | 0.60                   |
| $[2M+Na]^+$                                    | 543.1936       | 543.1916 | 0.05                   |

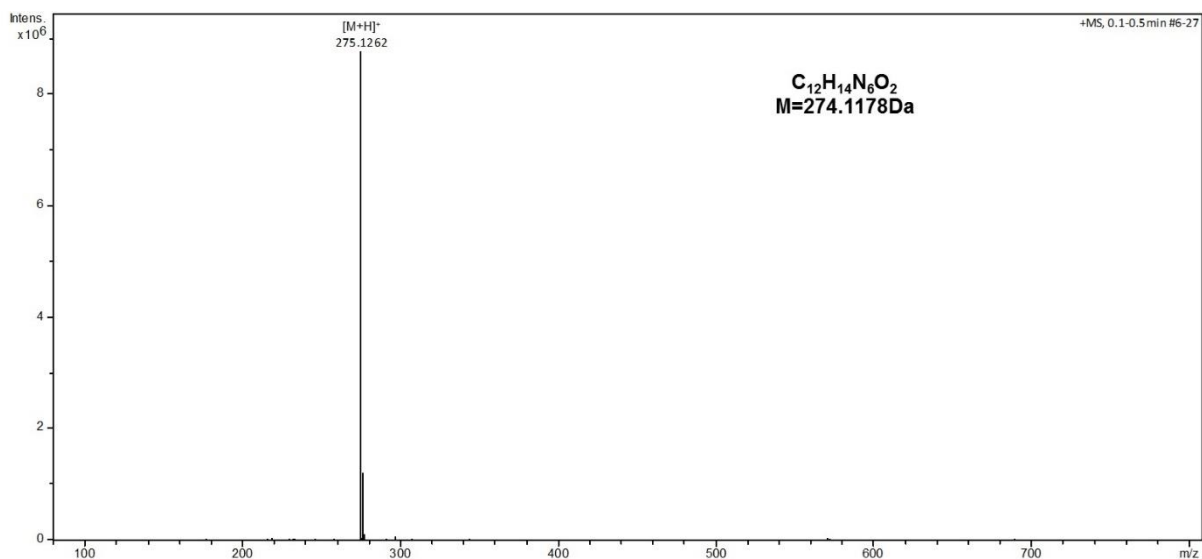

**Figure S4.** HR-ESI-MS spectrum of the compound **3c**.

**Table S6.** Analysis of other quasi-parent molecular ions of the compound **3c**.

| Other quasi-parent molecular ions of <b>3c</b> | Calculated m/z | Found    |                        |
|------------------------------------------------|----------------|----------|------------------------|
|                                                |                | m/z      | Relative intensity (%) |
| $[M+H-NH_3]^+$                                 | 258.0986       | 258.0995 | 0.22                   |
| $[M+Na]^+$                                     | 297.1070       | 297.1084 | 0.48                   |
| $[M+CH_3OH+H]^+$                               | 307.1513       | 307.1529 | 0.22                   |
| $[2M+Na]^+$                                    | 571.2249       | 571.2280 | 0.26                   |

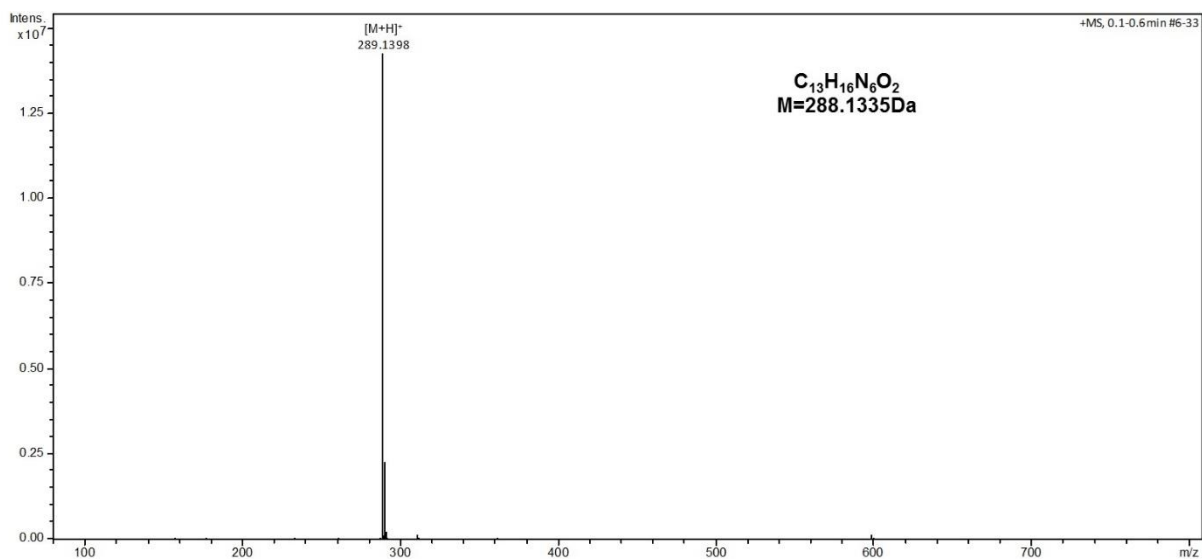**Figure S5.** HR-ESI-MS spectrum of the compound **3d**.**Table S7.** Analysis of other quasi-parent molecular ions of the compound **3d**.

| Other quasi-parent molecular ions of <b>3d</b> | Calculated m/z | Found    |                        |
|------------------------------------------------|----------------|----------|------------------------|
|                                                |                | m/z      | Relative intensity (%) |
| $[M+Na]^+$                                     | 311.1227       | 311.1215 | 0.84                   |
| $[2M+Na]^+$                                    | 599.2562       | 599.2541 | 0.84                   |

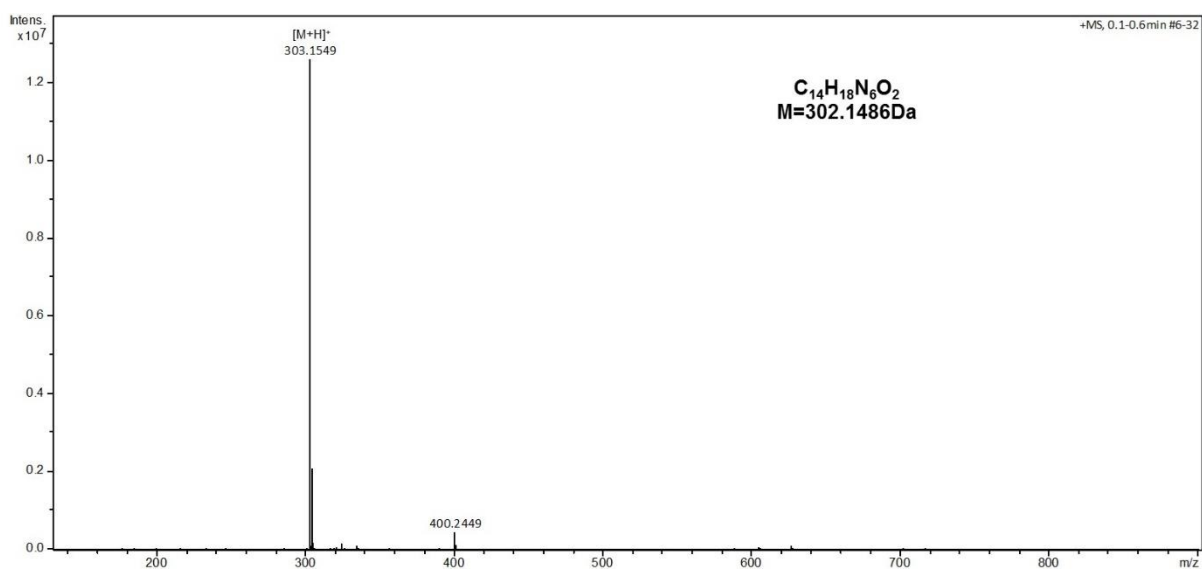

**Figure S6.** HR-ESI-MS spectrum of the compound **3e**.

**Table S8.** Analysis of other quasi-parent molecular ions of the compound **3e**.

| Other quasi-parent molecular ions of <b>3e</b> | Calculated $m/z$ | Found    |                        |
|------------------------------------------------|------------------|----------|------------------------|
|                                                |                  | $m/z$    | Relative intensity (%) |
| $[M+Na]^+$                                     | 325.1383         | 325.1371 | 1.22                   |
| $[M+CH_3OH+H]^+$                               | 335.1826         | 335.1809 | 0.67                   |
| $[M+Na+CH_3CN+2NH_4-2H]^+$                     | 400.2180         | 400.2449 | 3.61                   |
| $[2M+H]^+$                                     | 605.3055         | 605.3041 | 0.43                   |
| $[2M+Na]^+$                                    | 627.2875         | 627.2863 | 0.69                   |

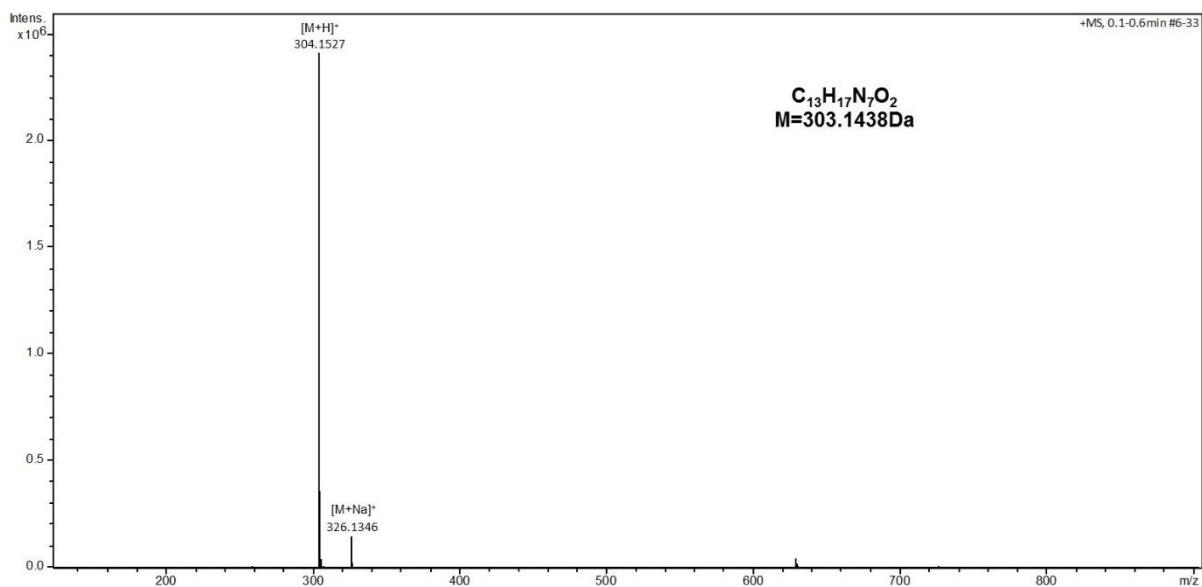

**Figure S7.** HR-ESI-MS spectrum of the compound **3f**.



**Table S9.** Analysis of other quasi-parent molecular ions of the compound **3f**.

| Other quasi-parent molecular ions of <b>3f</b> | Calculated m/z | Found    |                        |
|------------------------------------------------|----------------|----------|------------------------|
|                                                |                | m/z      | Relative intensity (%) |
| $[M+Na]^+$                                     | 326.1336       | 326.1346 | 6.10                   |
| $[M+CH_3OH+H]^+$                               | 336.1779       | 336.1788 | 0.07                   |
| $[2M+Na]^+$                                    | 629.2780       | 629.2805 | 1.84                   |

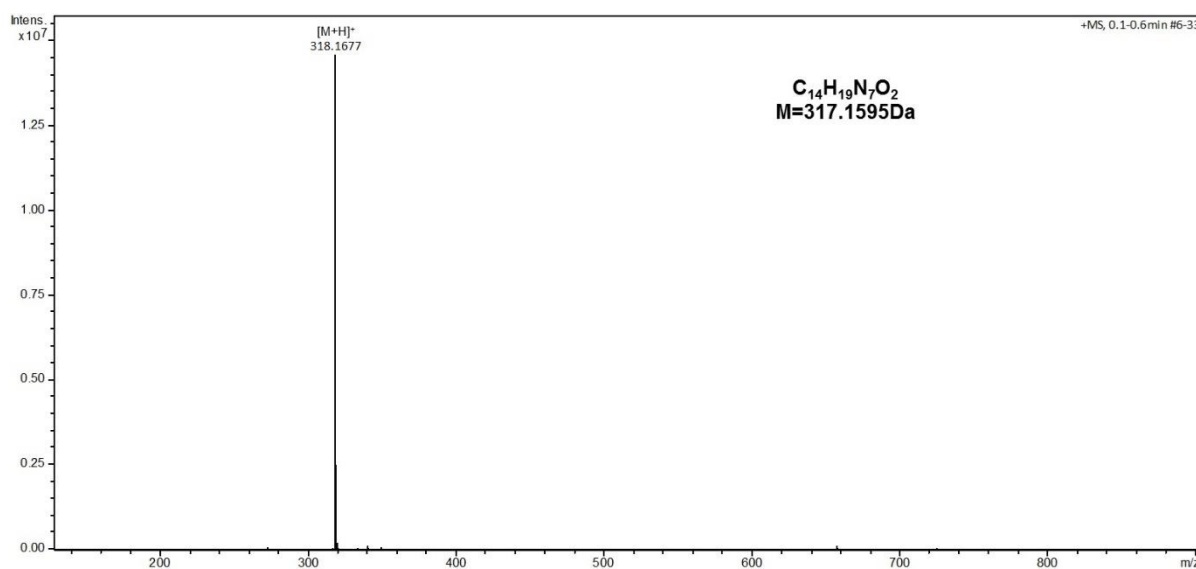**Figure S8.** HR-ESI-MS spectrum of the compound **3g**.**Table S10.** Analysis of other quasi-parent molecular ions of the compound **3g**.

| Other quasi-parent molecular ions of <b>3g</b> | Calculated m/z | Found    |                        |
|------------------------------------------------|----------------|----------|------------------------|
|                                                |                | m/z      | Relative intensity (%) |
| $[M+Na]^+$                                     | 340.1492       | 340.1497 | 0.76                   |
| $[M+CH_3OH+H]^+$                               | 350.1935       | 350.1938 | 0.56                   |
| $[2M+Na]^+$                                    | 657.3093       | 657.3113 | 0.65                   |

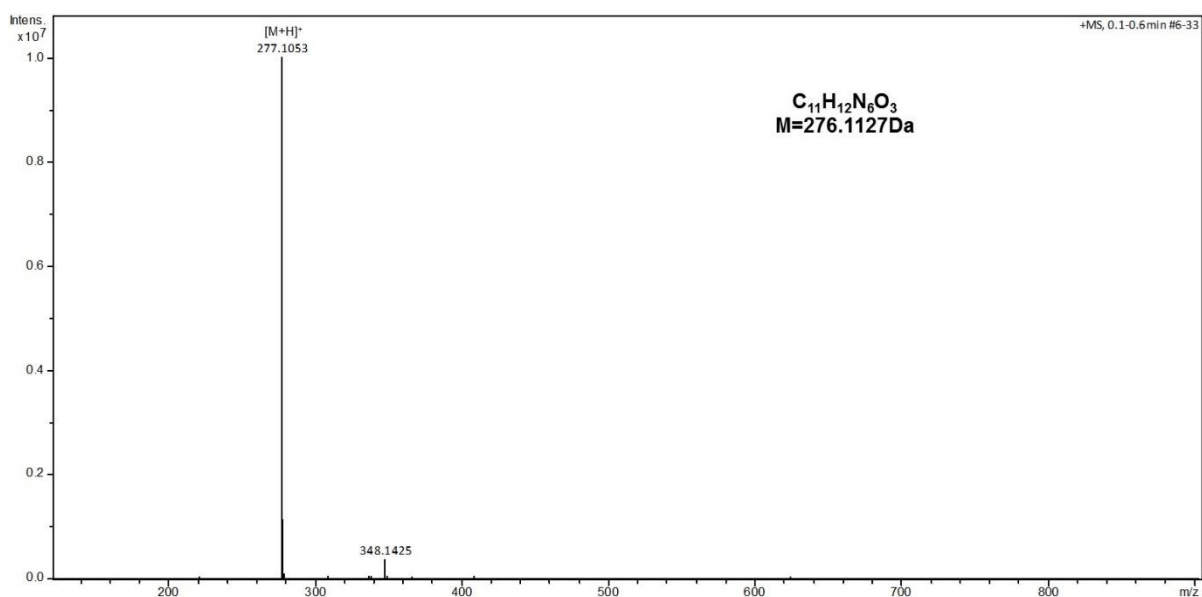

**Figure S9.** HR-ESI-MS spectrum of the compound **3h**.

**Table S11.** Analysis of other quasi-parent molecular ions of the compound **3h**.

| Other quasi-parent molecular ions of <b>3h</b> | Calculated $m/z$ | Found    |                        |
|------------------------------------------------|------------------|----------|------------------------|
|                                                |                  | $m/z$    | Relative intensity (%) |
| $[M+Na]^+$                                     | 299.0863         | 299.0865 | 0.14                   |
| $[M+CH_3OH+H]^+$                               | 309.1306         | 309.1309 | 0.68                   |
| $[M+Na+K-H]^+$                                 | 337.0422         | 337.1413 | 0.65                   |
| $[M+CH_3OH+Na+NH_4-H]^+$                       | 348.1391         | 348.1425 | 3.78                   |
| $[2M+H]^+$                                     | 553.2015         | 553.2023 | 0.11                   |
| $[2M+CH_3OH+Na+NH_4-H]^+$                      | 624.2362         | 624.2396 | 0.36                   |

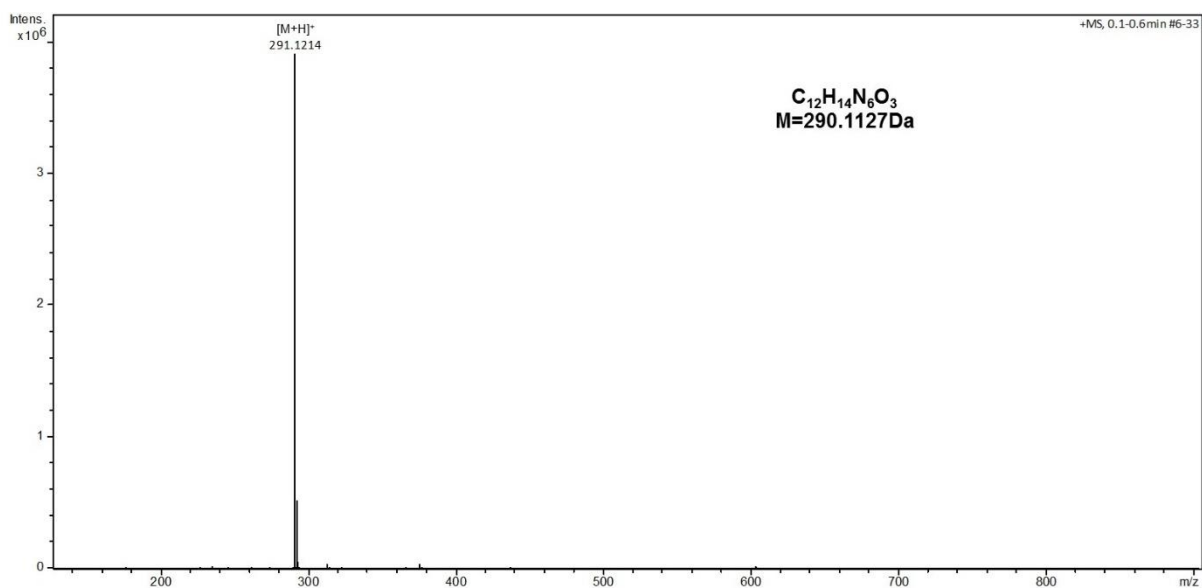

**Figure S10.** HR-ESI-MS spectrum of the compound **3i**.

**Table S12.** Analysis of other quasi-parent molecular ions of the compound **3i**.

| Other quasi-parent molecular ions of <b>3i</b> | Calculated m/z | Found    |                                     |
|------------------------------------------------|----------------|----------|-------------------------------------|
|                                                |                | m/z      | Relative intensity (%) to base peak |
| $[M+Na]^+$                                     | 313.1020       | 313.1023 | 0.94                                |
| $[M+CH_3OH+H]^+$                               | 323.1462       | 323.1467 | 0.21                                |
| $[2M+Na]^+$                                    | 603.2147       | 603.2153 | 0.36                                |

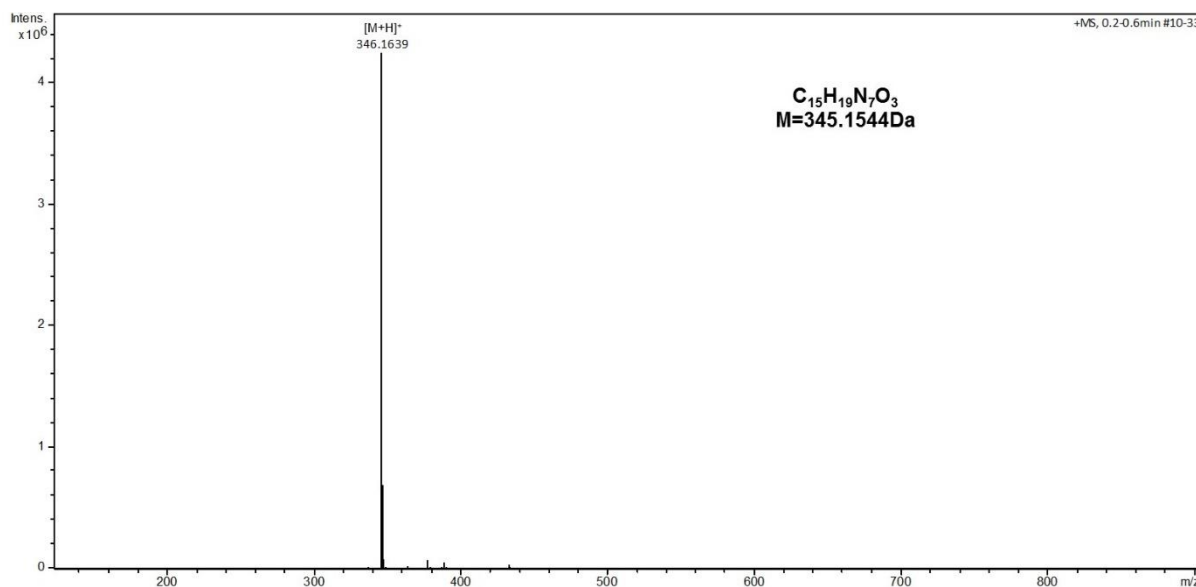**Figure S11.** HR-ESI-MS spectrum of the compound **3j**.**Table S13.** Analysis of other quasi-parent molecular ions of the compound **3j**.

| Other quasi-parent molecular ions of <b>3j</b> | Calculated m/z | Found    |                                     |
|------------------------------------------------|----------------|----------|-------------------------------------|
|                                                |                | m/z      | Relative intensity (%) to base peak |
| $[M+Na]^+$                                     | 368.1442       | 368.1451 | 0.09                                |
| $[M+CH_3OH+H]^+$                               | 378.1884       | 368.1891 | 1.48                                |
| $[2M+H]^+$                                     | 691.3171       | 691.3189 | 0.08                                |

## Visualizations of Nuclear magnetic resonance (NMR) and Infrared (IR) spectra of intermediate 2

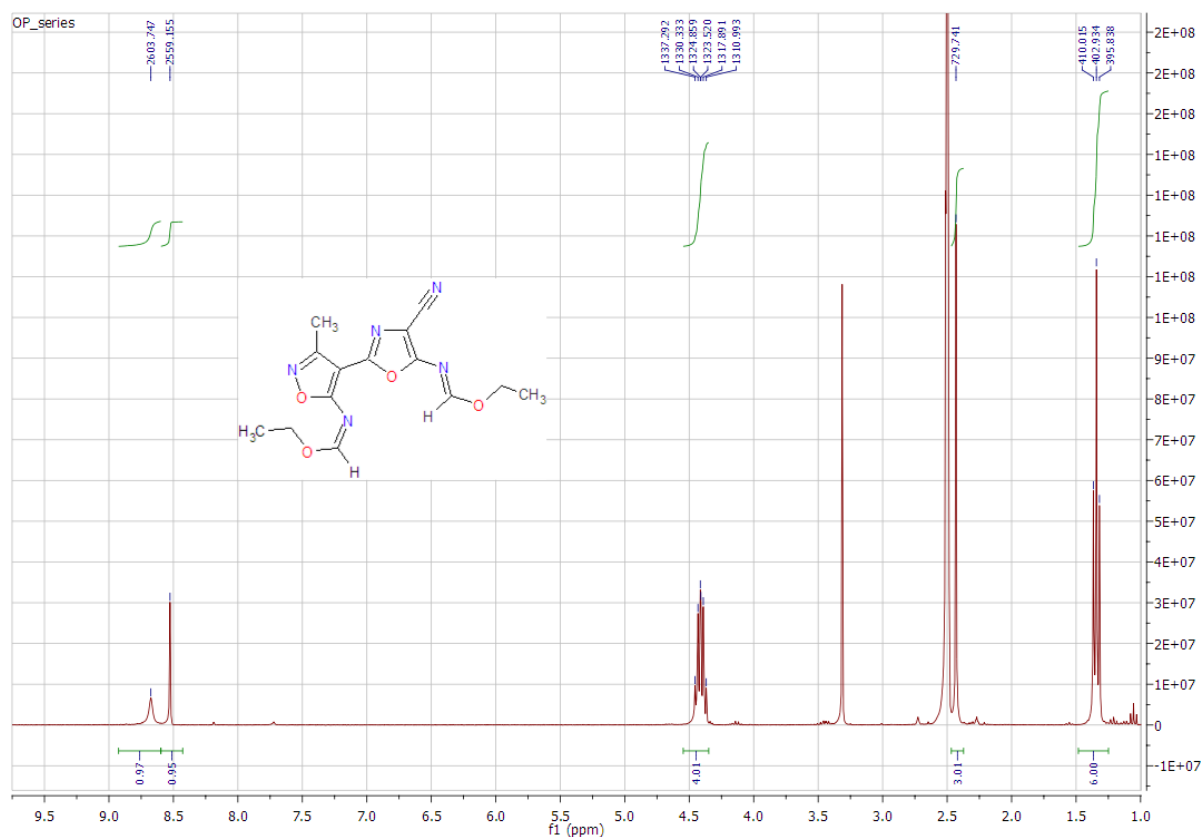

**Figure S12.** <sup>1</sup>H-NMR spectrum of intermediate **2** in DMSO-*d*<sub>6</sub>.

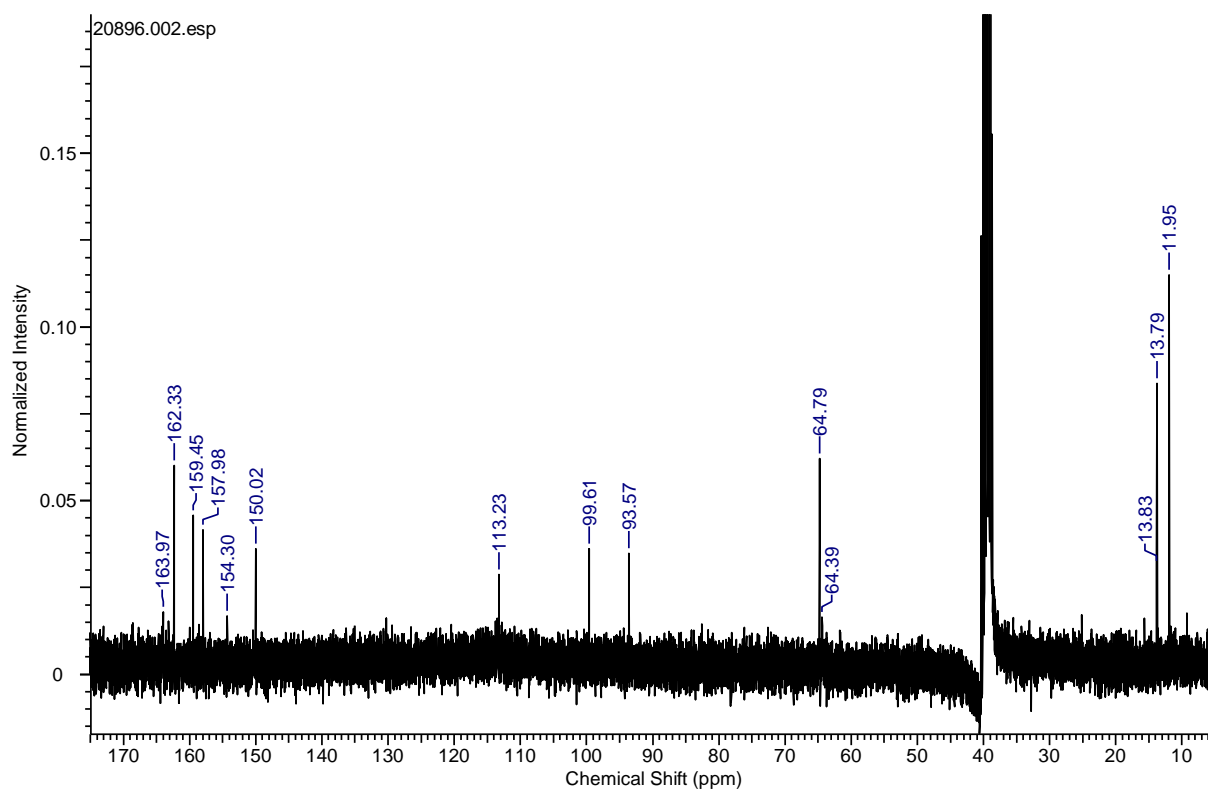

**Figure S13.** <sup>13</sup>C-NMR spectrum of intermediate **2** in DMSO-*d*<sub>6</sub>.

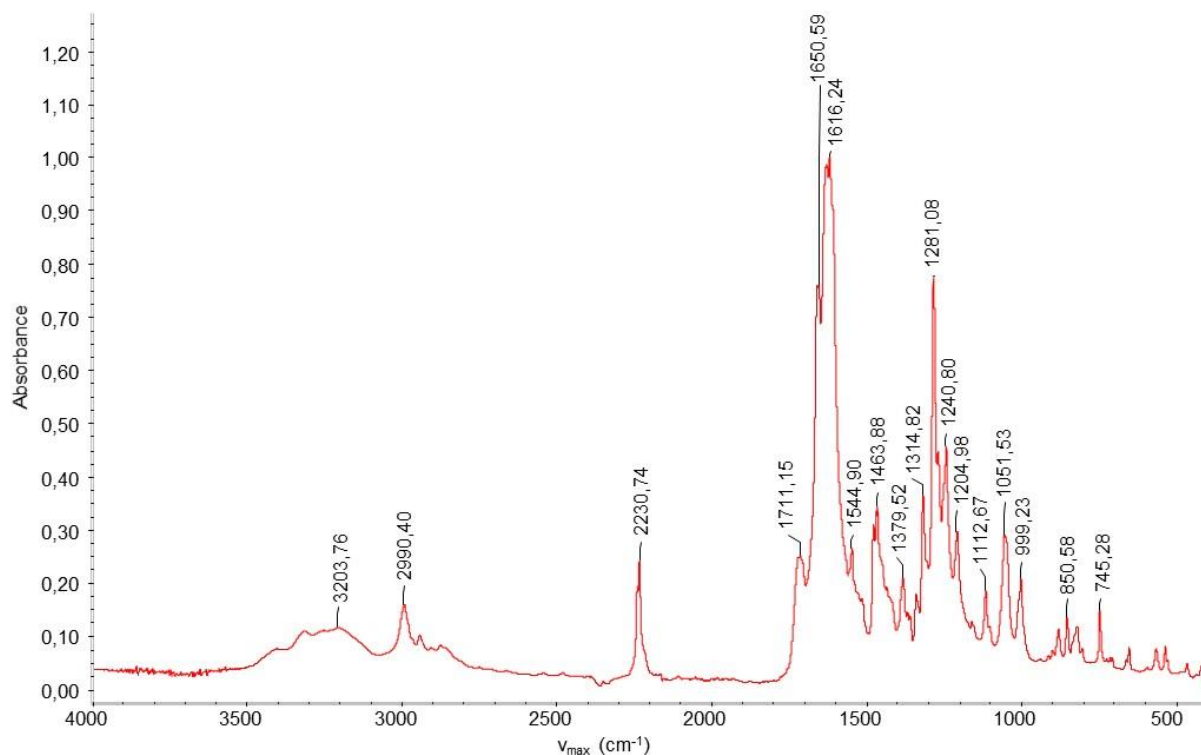

**Figure S14.** ATR-FTIR spectrum of intermediate **2**.

### Visualizations of Nuclear magnetic resonance (NMR) and Infrared (IR) spectra of the compound **3a**

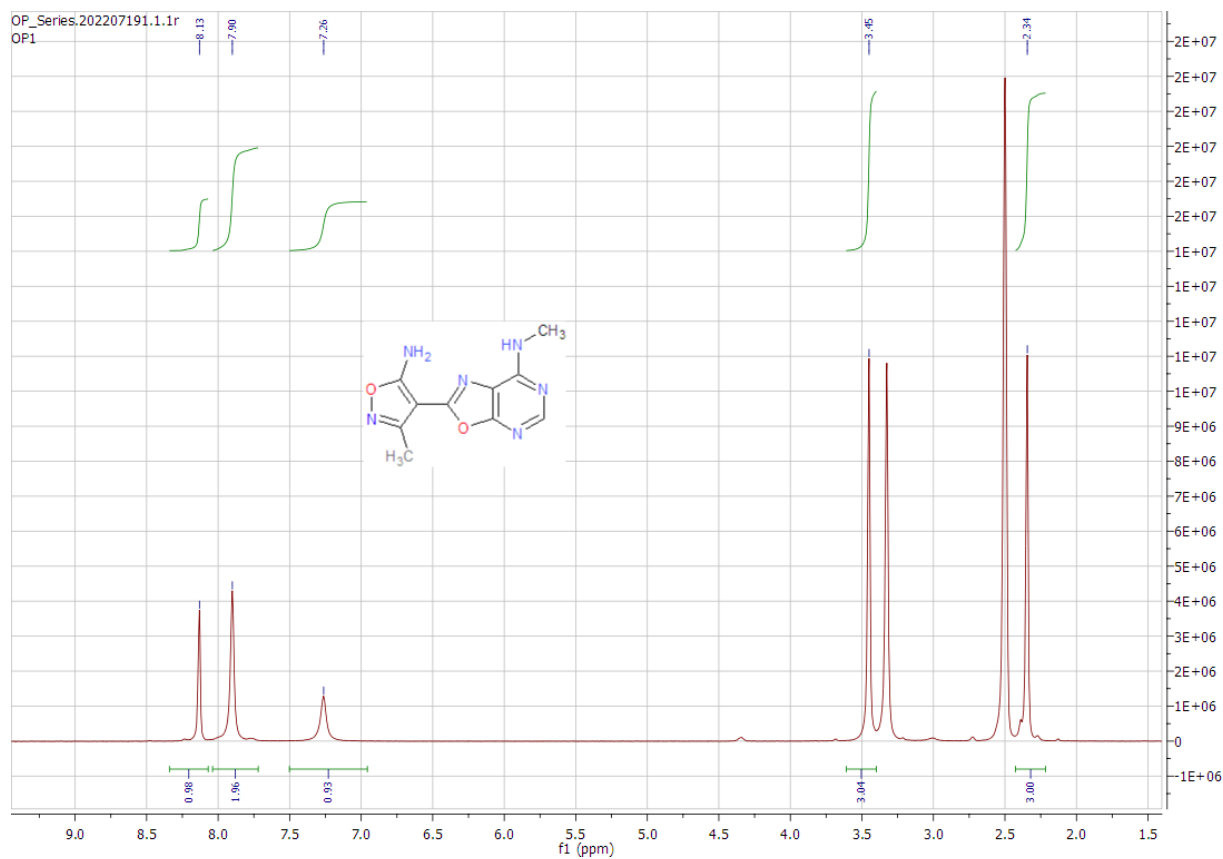

**Figure S15.**  $^1\text{H}$ -NMR spectrum of the compound **3a** in  $\text{DMSO}-d_6$ .

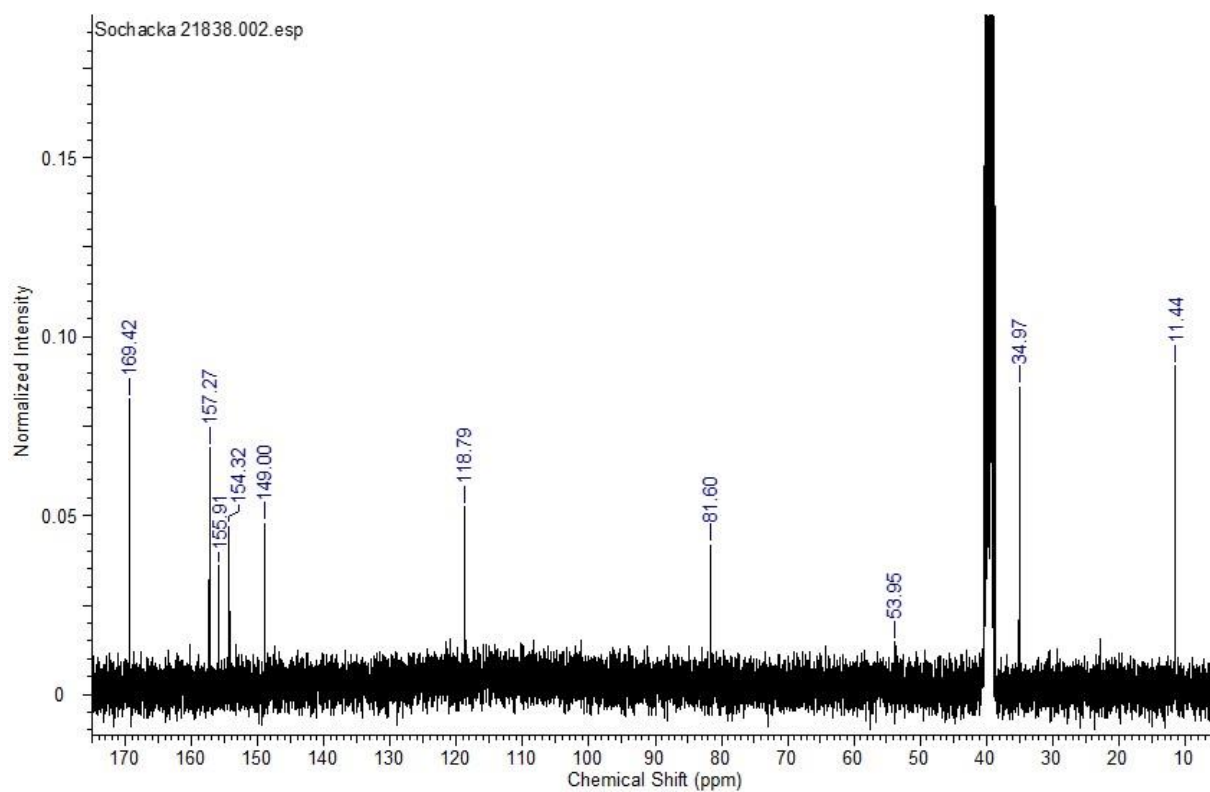

**Figure S16.**  $^{13}\text{C}$ -NMR spectrum of the compound **3a** in  $\text{DMSO}-d_6$ .

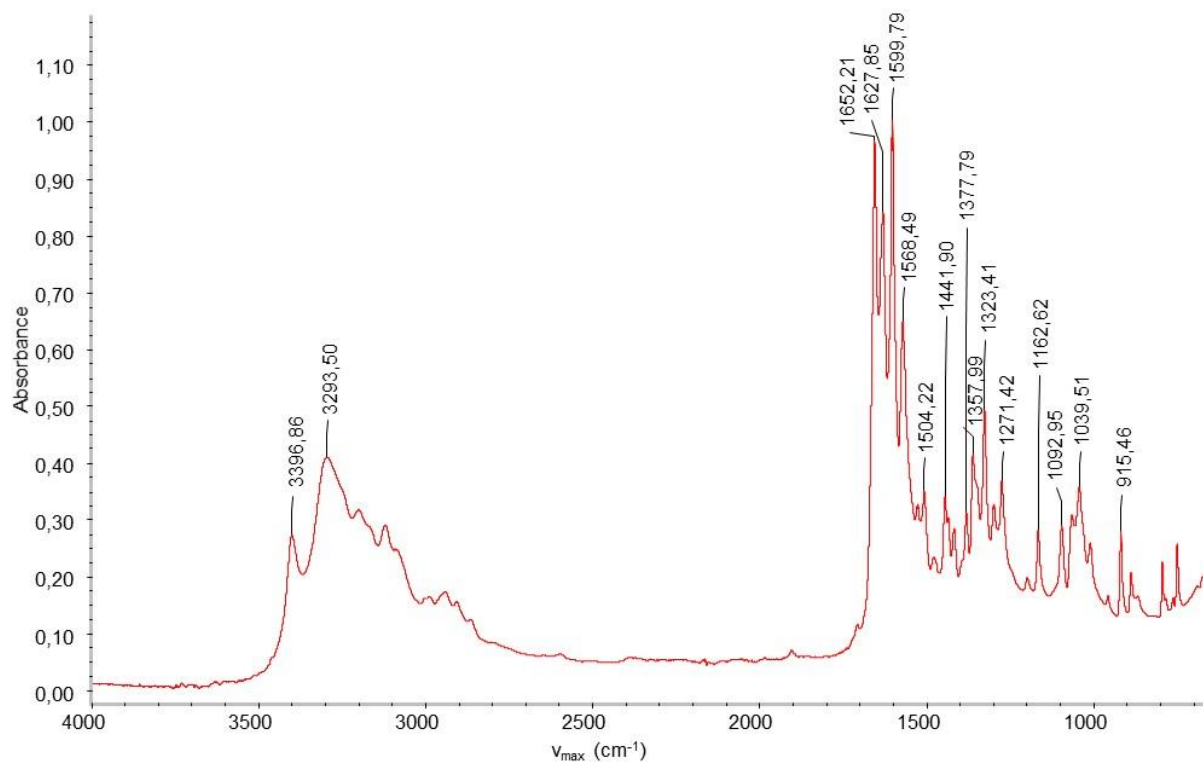

**Figure S17.** ATR-FTIR spectrum of the compound **3a**.

## Visualizations of Nuclear magnetic resonance (NMR) and Infrared (IR) spectra of the compound **3b**

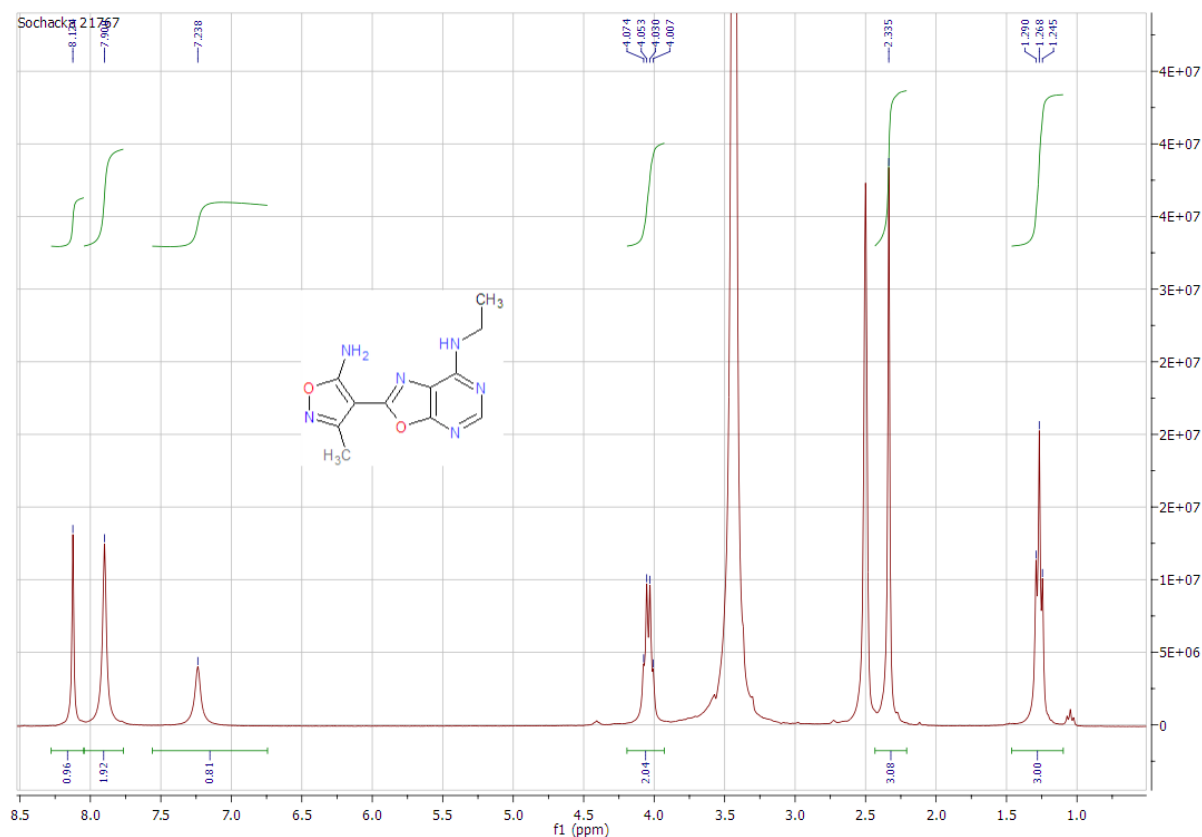

**Figure S18.** <sup>1</sup>H-NMR spectrum of the compound **3b** in DMSO-*d*<sub>6</sub>.

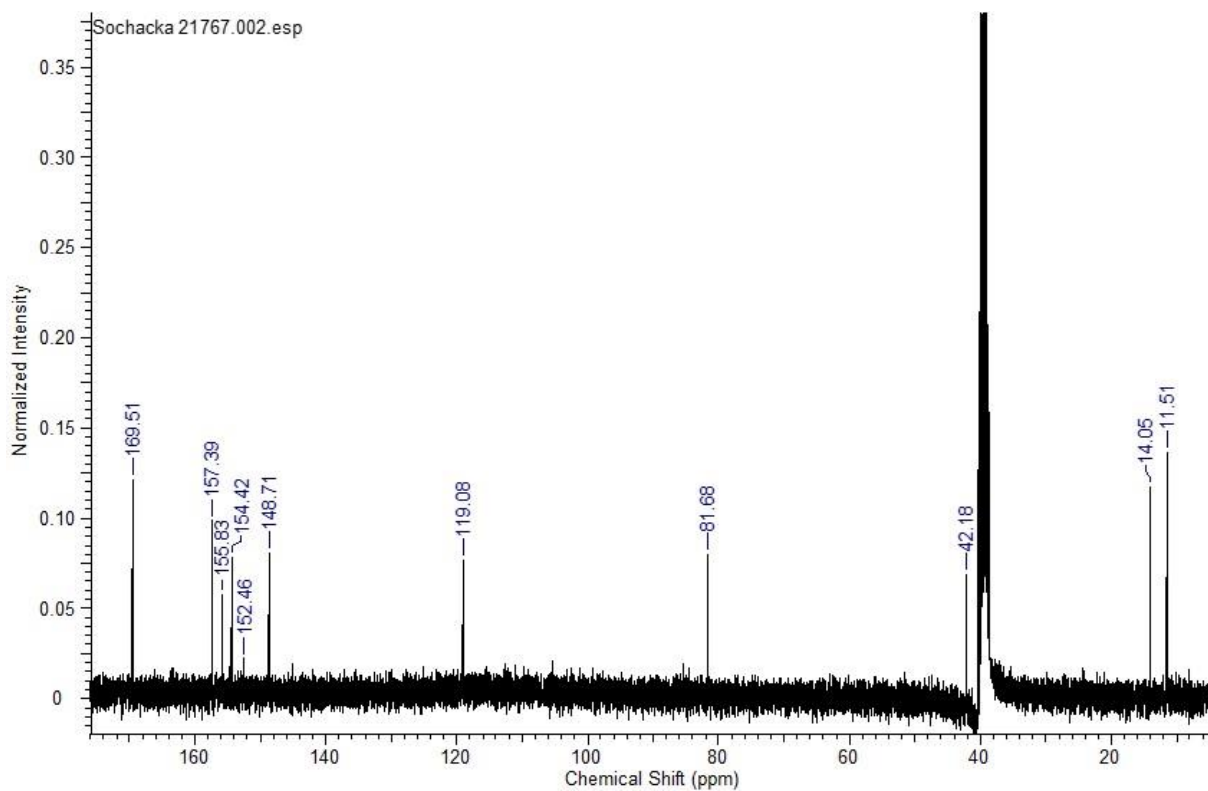

**Figure S19.** <sup>13</sup>C-NMR spectrum of the compound **3b** in DMSO-*d*<sub>6</sub>.

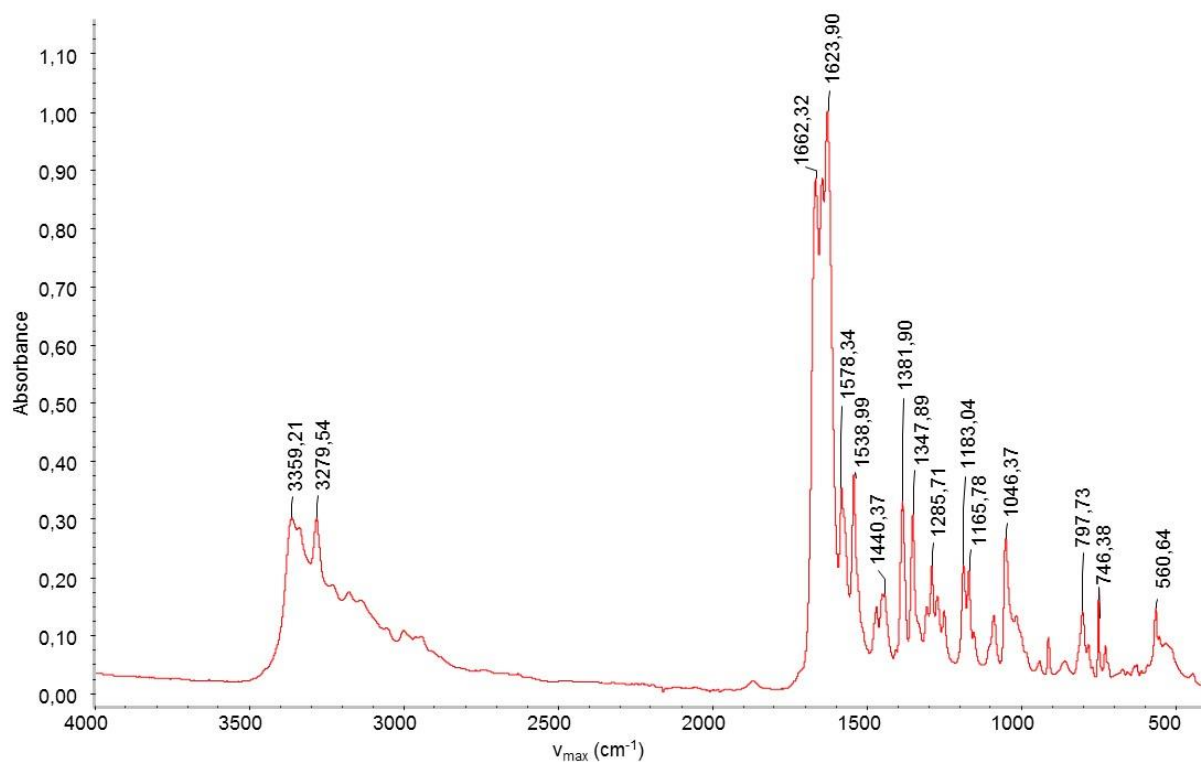

**Figure S20.** ATR-FTIR spectrum of the compound **3b**.

### Visualizations of Nuclear magnetic resonance (NMR) and Infrared (IR) spectra of the compound **3c**

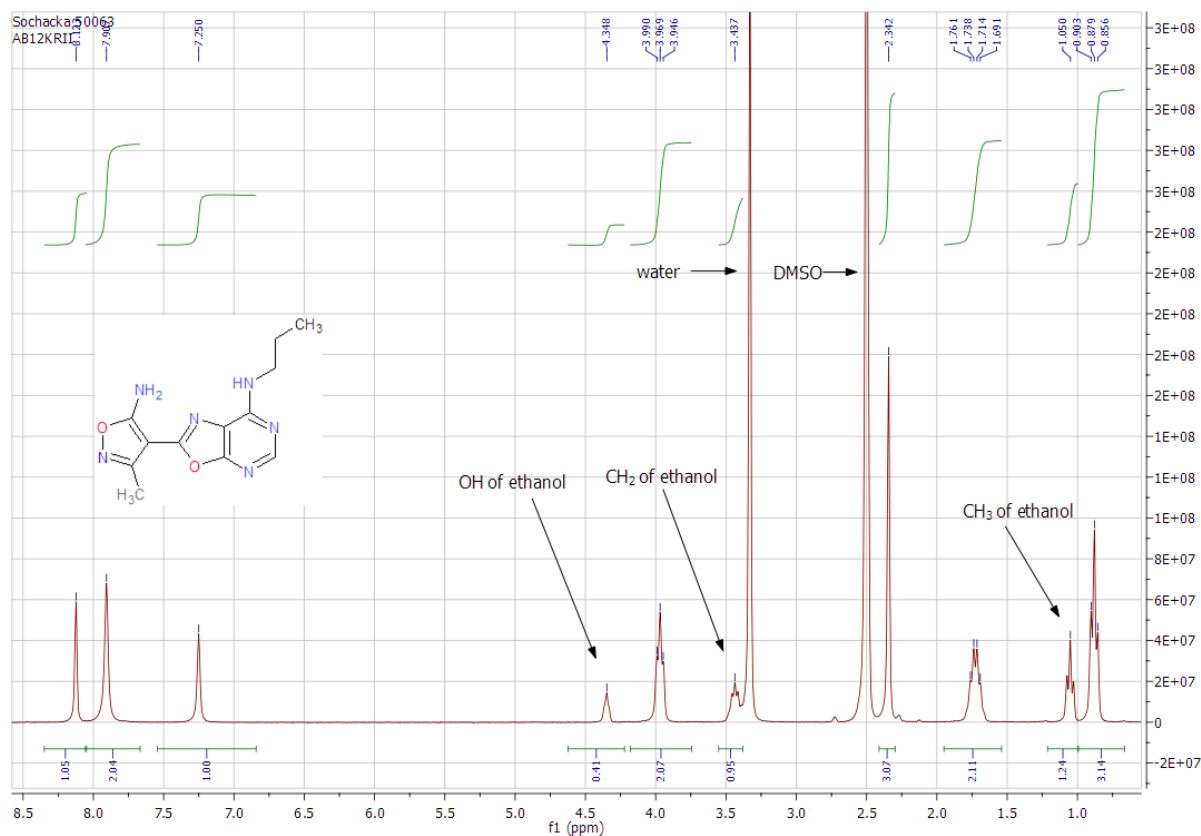

**Figure S21.** <sup>1</sup>H-NMR spectrum of the compound **3c** in DMSO-*d*<sub>6</sub>.



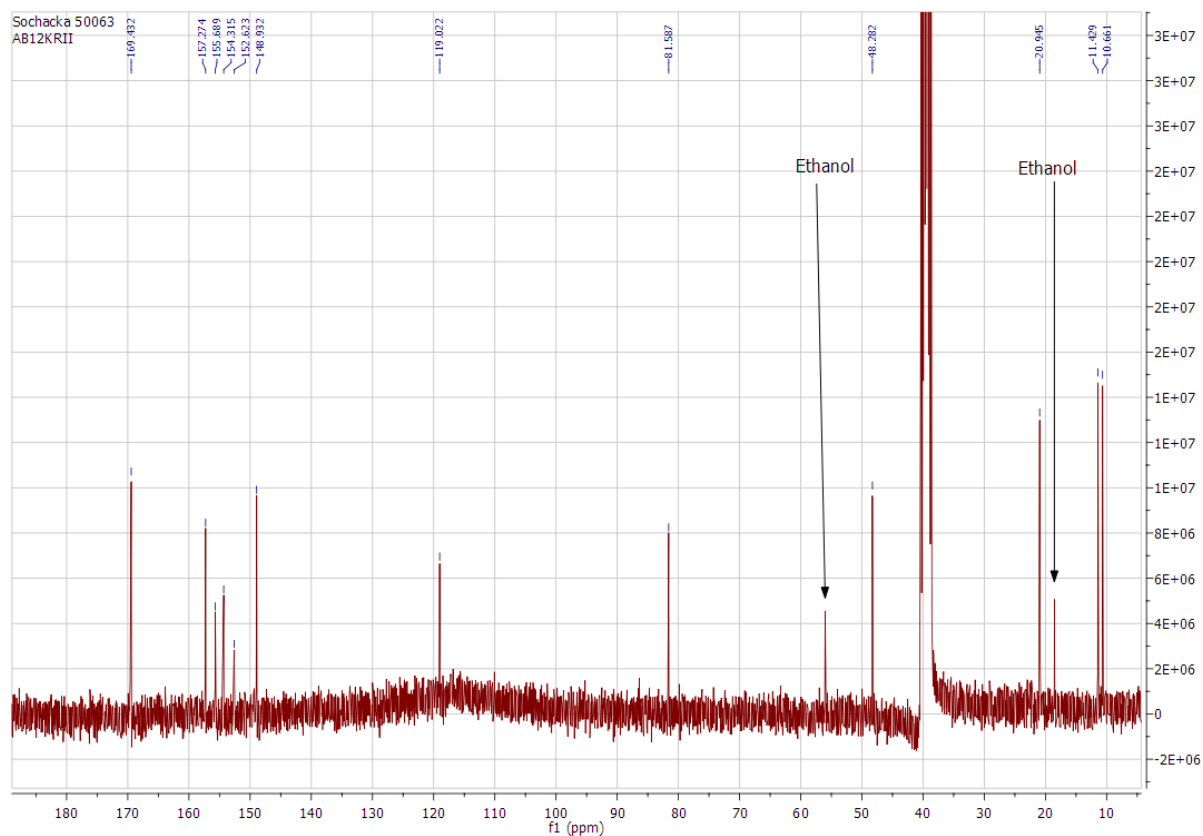

**Figure S22.**  $^{13}\text{C}$ -NMR spectrum of the compound **3c** in  $\text{DMSO-}d_6$ .

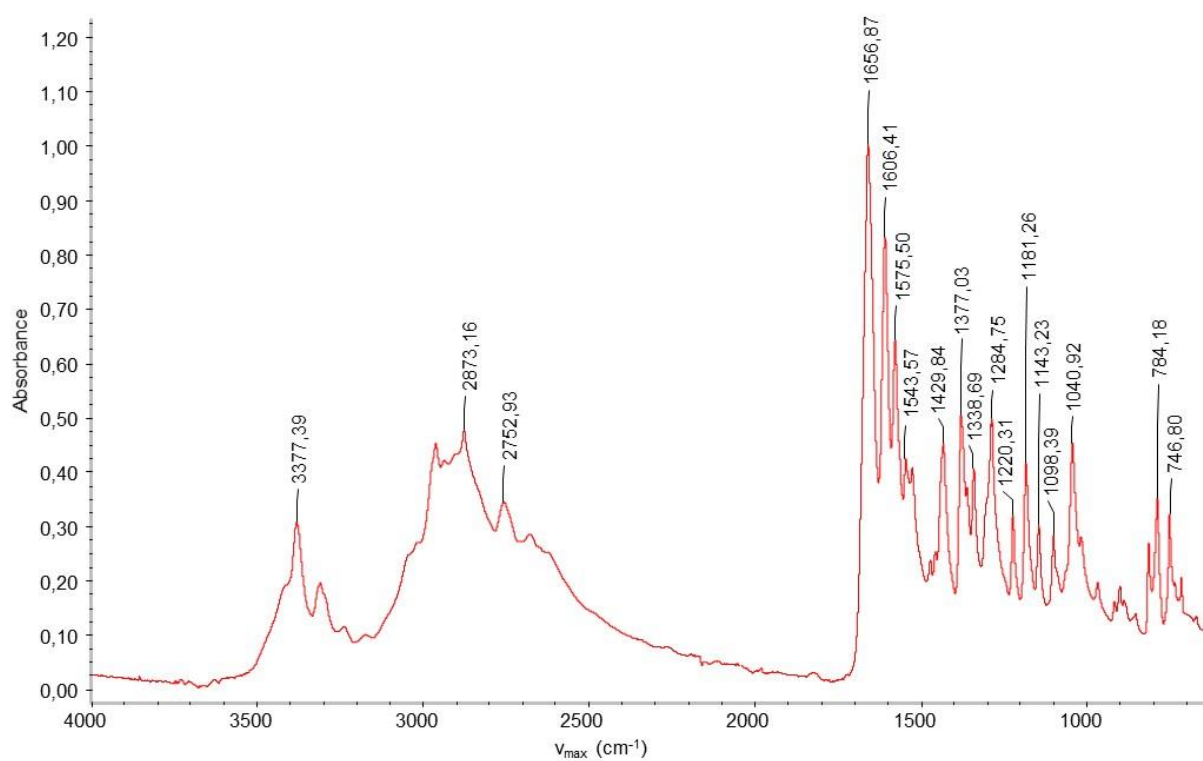

**Figure S23.** ATR-FTIR spectrum of the compound **3c**.

## Visualizations of Nuclear magnetic resonance (NMR) and Infrared (IR) spectra of the compound **3d**

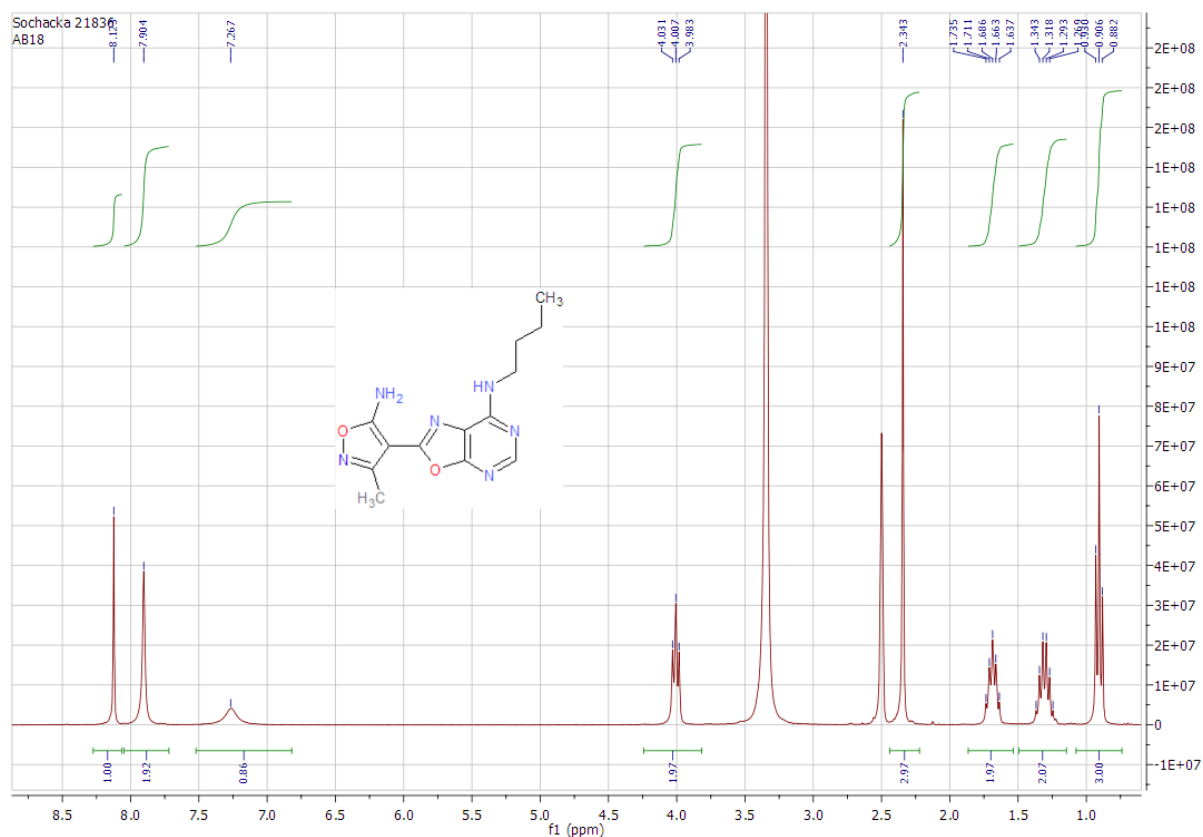

**Figure S24.** <sup>1</sup>H-NMR spectrum of the compound **3d** in DMSO-*d*<sub>6</sub>.

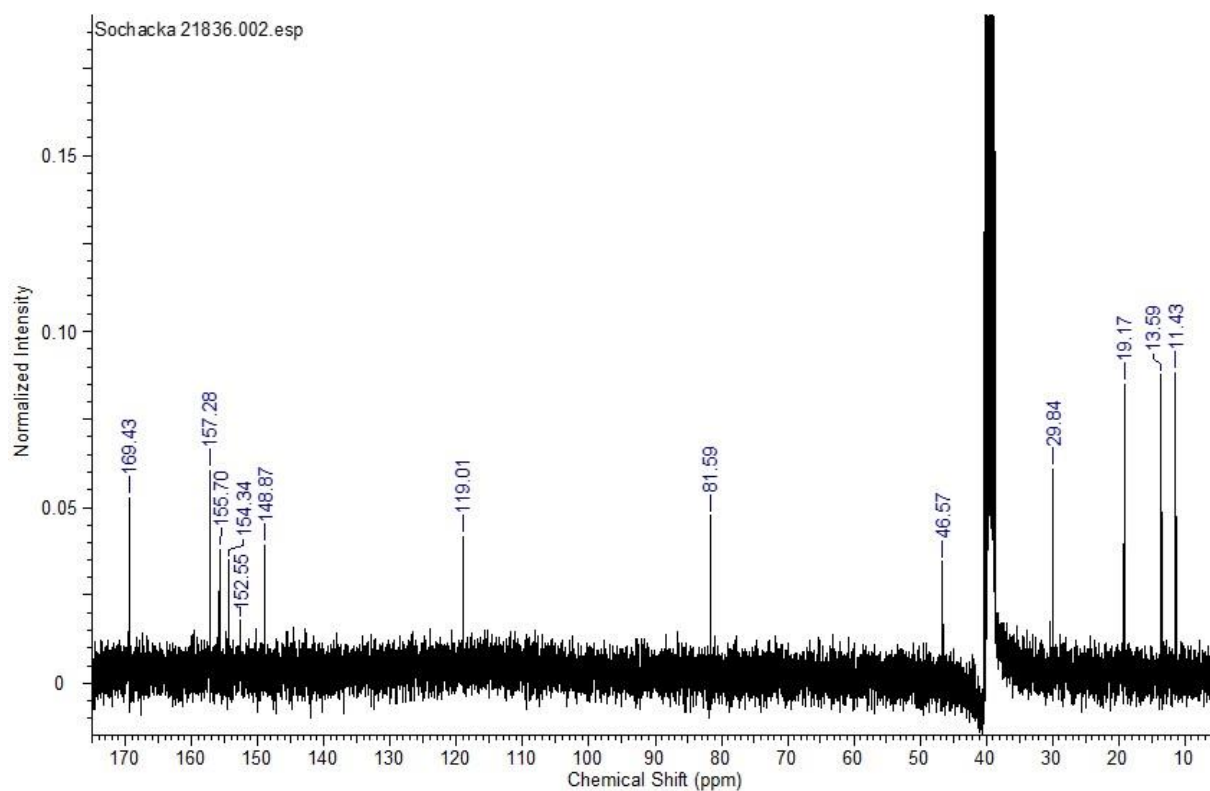

**Figure S25.** <sup>13</sup>C-NMR spectrum of the compound **3d** in DMSO-*d*<sub>6</sub>.

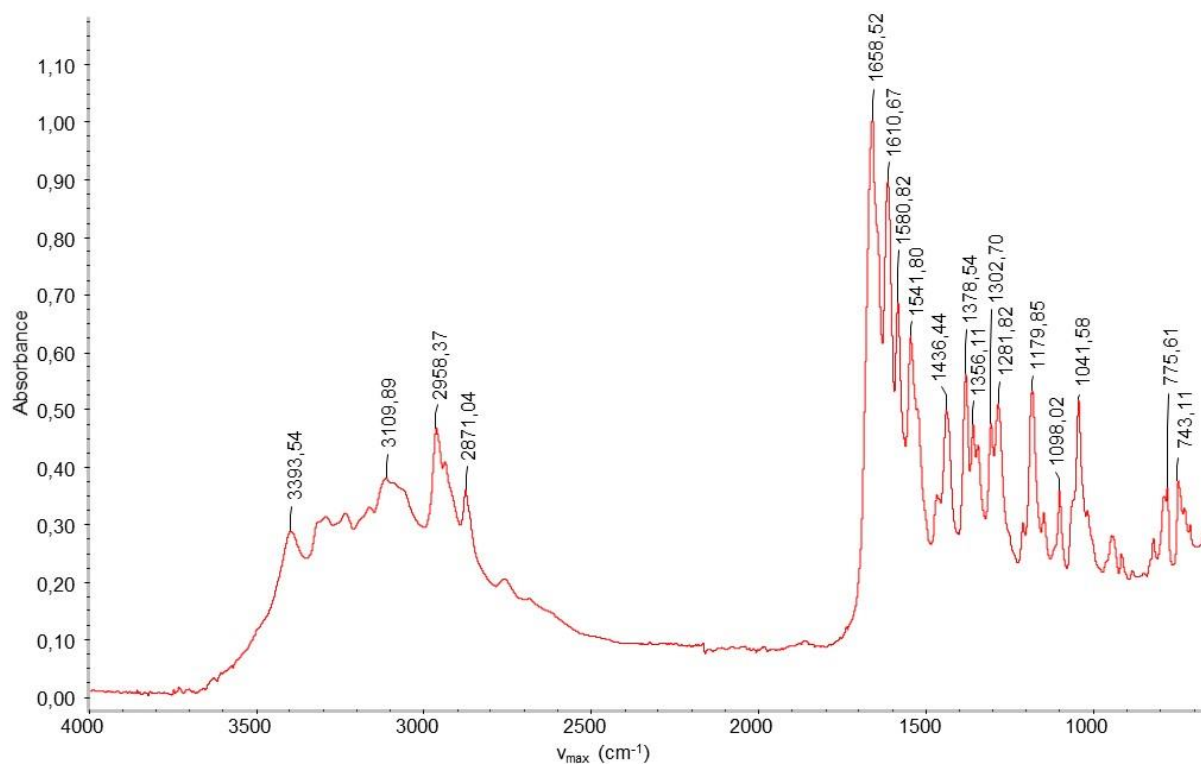

**Figure S26.** ATR-FTIR spectrum of the compound **3d**.

### Visualizations of Nuclear magnetic resonance (NMR) and Infrared (IR) spectra of the compound **3e**

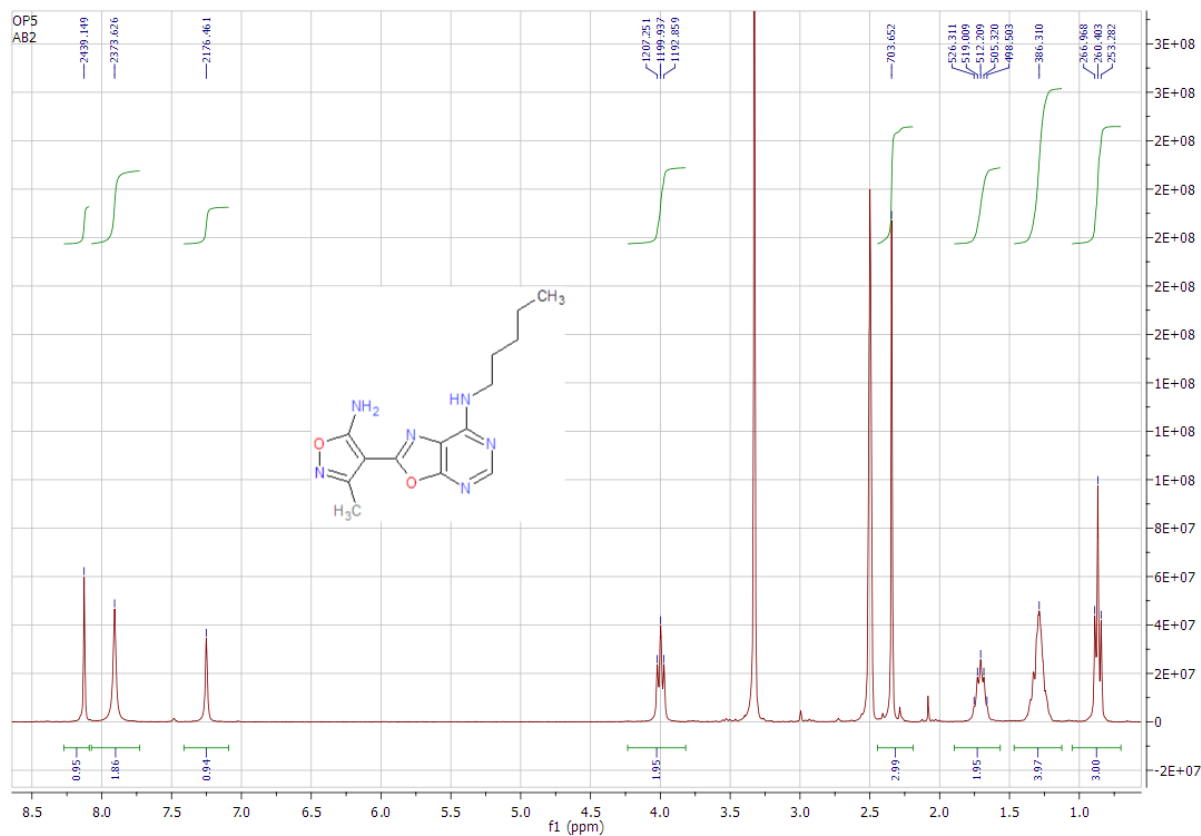

**Figure S27.** <sup>1</sup>H-NMR spectrum of the compound **3e** in DMSO-*d*<sub>6</sub>.

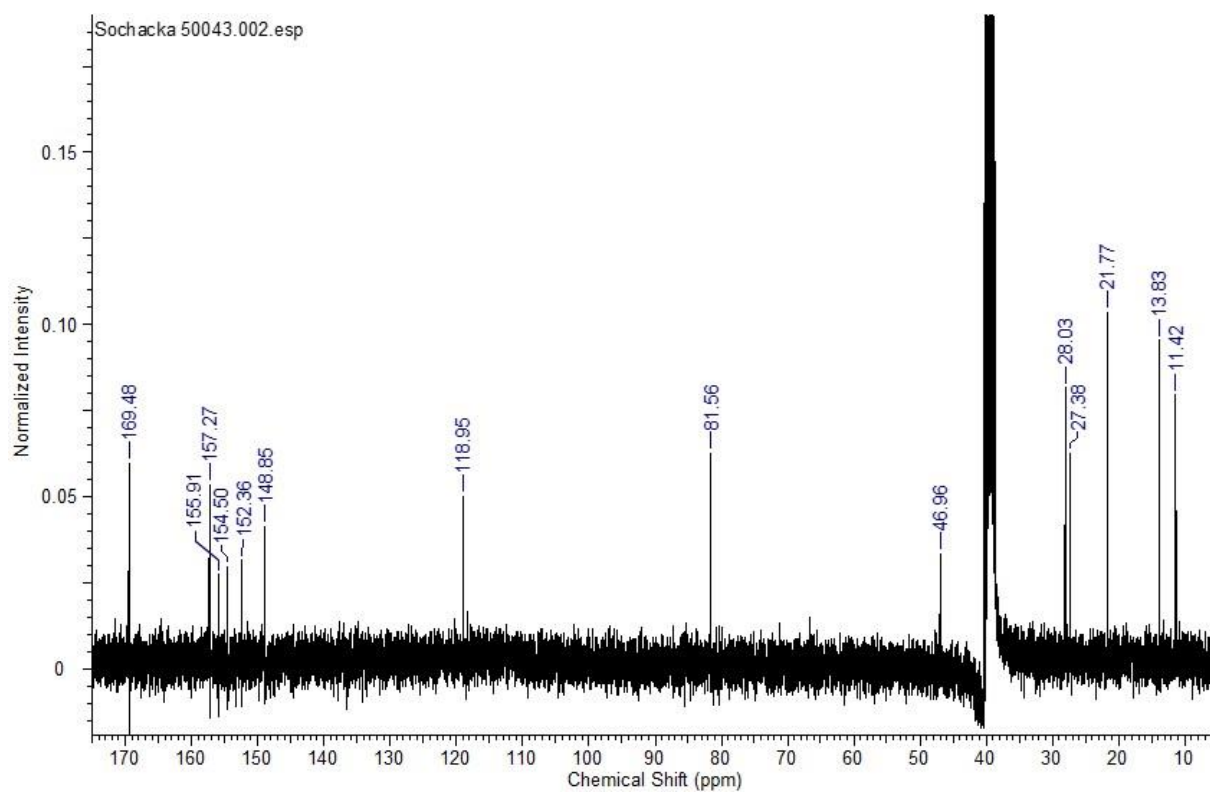

**Figure S28.**  $^{13}\text{C}$ -NMR spectrum of the compound **3e** in  $\text{DMSO-}d_6$ .

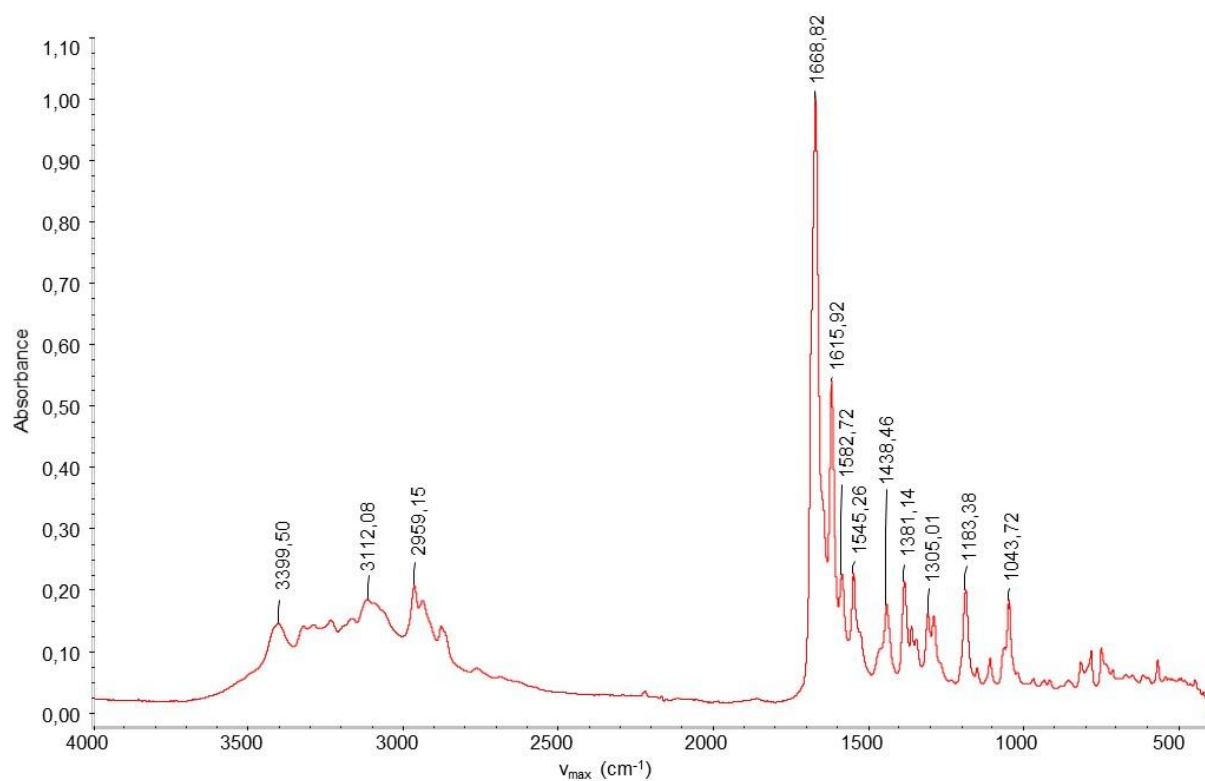

**Figure S29.** ATR-FTIR spectrum of the compound **3e**.

## Visualizations of Nuclear magnetic resonance (NMR) and Infrared (IR) spectra of the compound **3f**

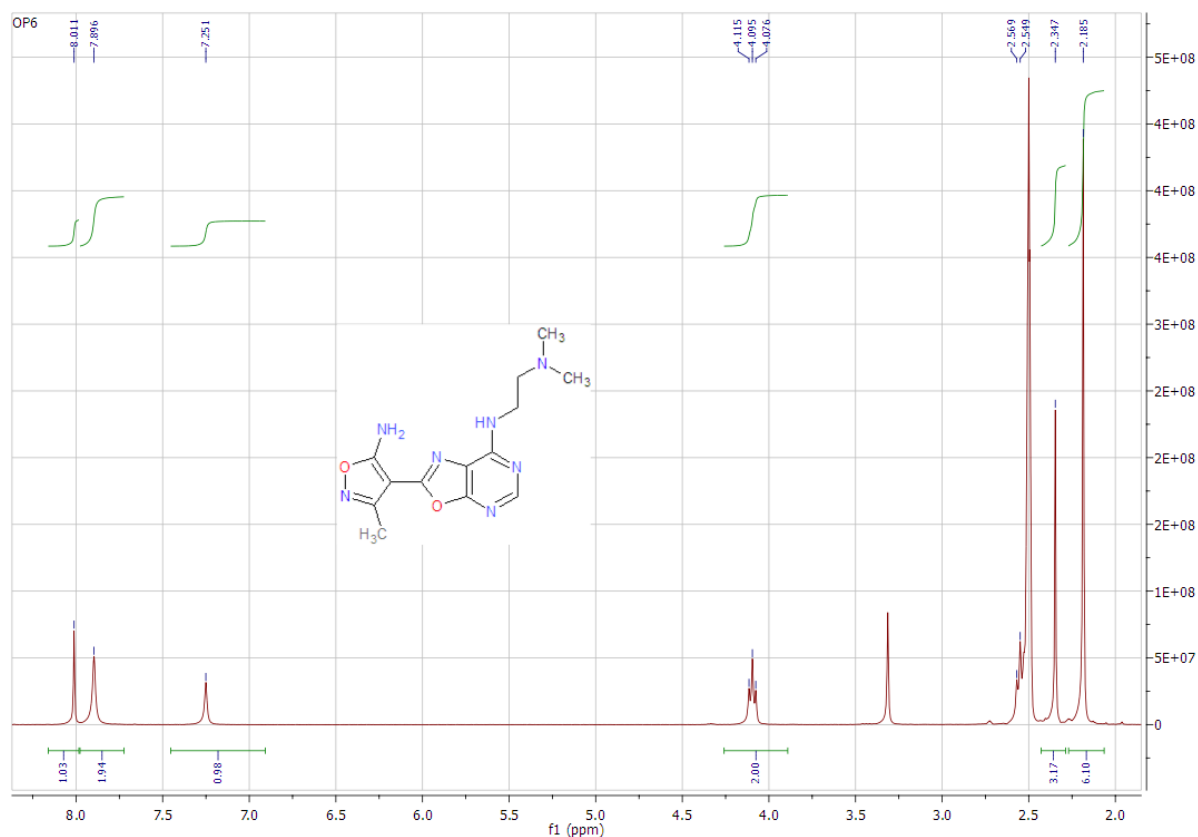

**Figure S30.** <sup>1</sup>H-NMR spectrum of the compound **3f** in DMSO-*d*<sub>6</sub>.

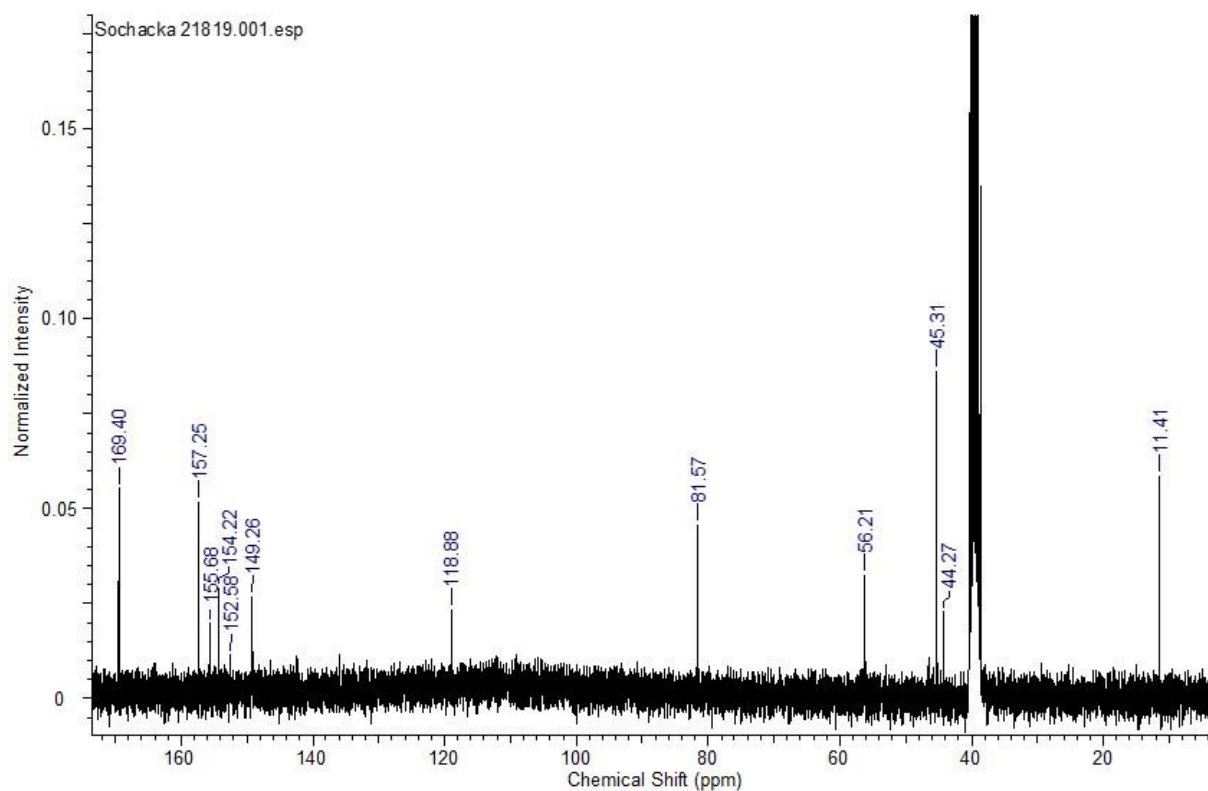

**Figure S31.** <sup>13</sup>C-NMR spectrum of the compound **3f** in DMSO-*d*<sub>6</sub>.

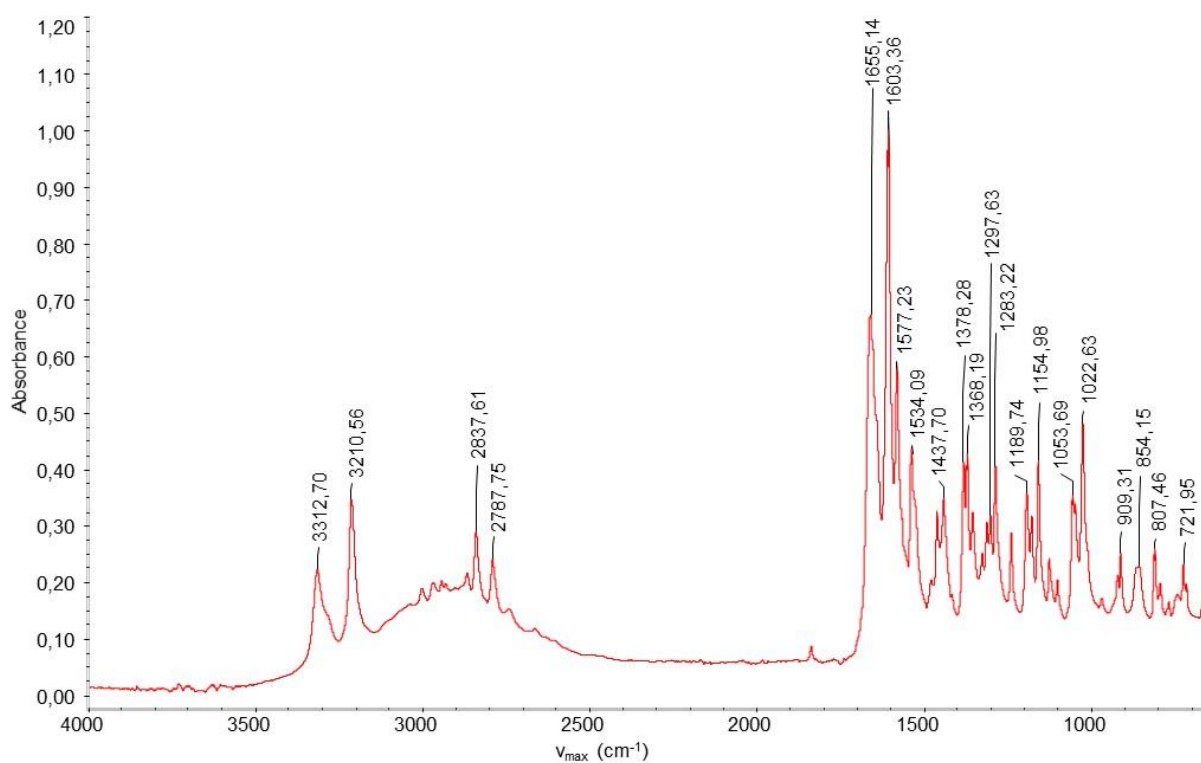

**Figure S32.** ATR-FTIR spectrum of the compound 3f.

**Visualizations of Nuclear magnetic resonance (NMR) and Infrared (IR) spectra of the compound 3g**

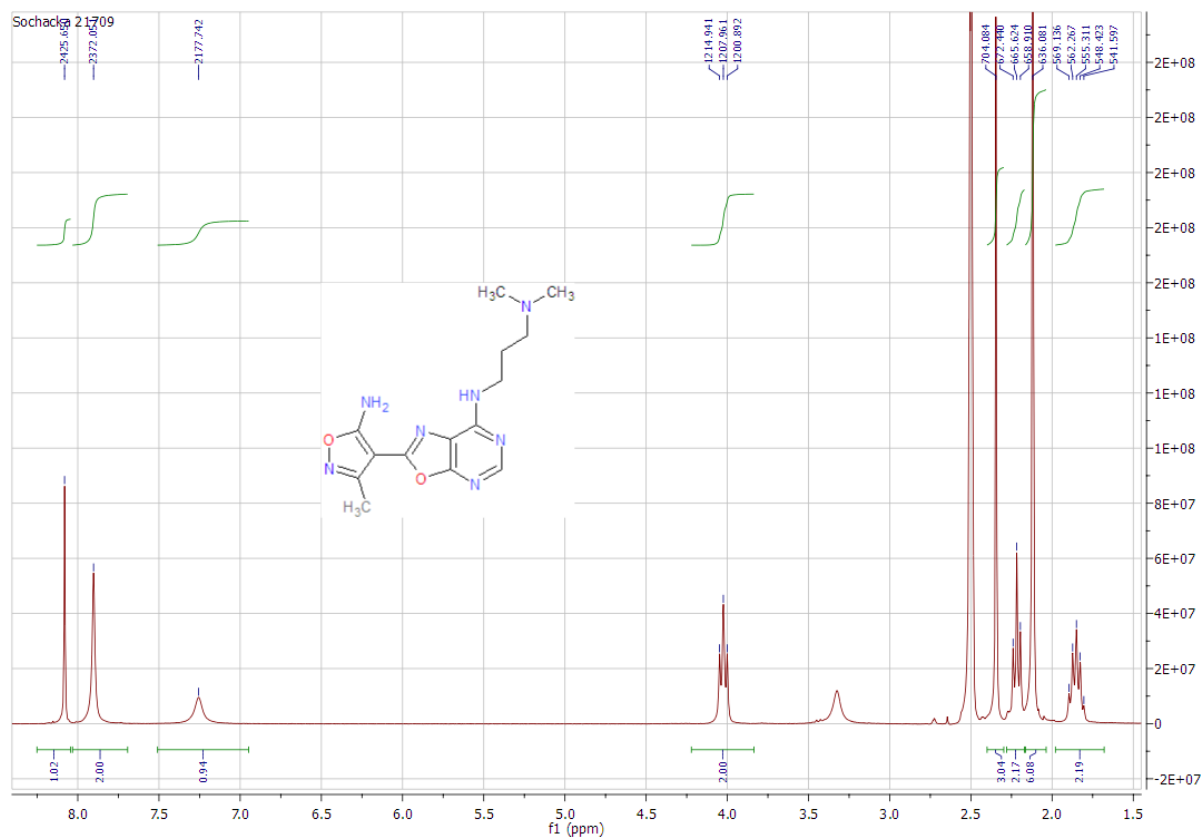

**Figure S33.** <sup>1</sup>H-NMR spectrum of the compound 3g in DMSO- $d_6$ .

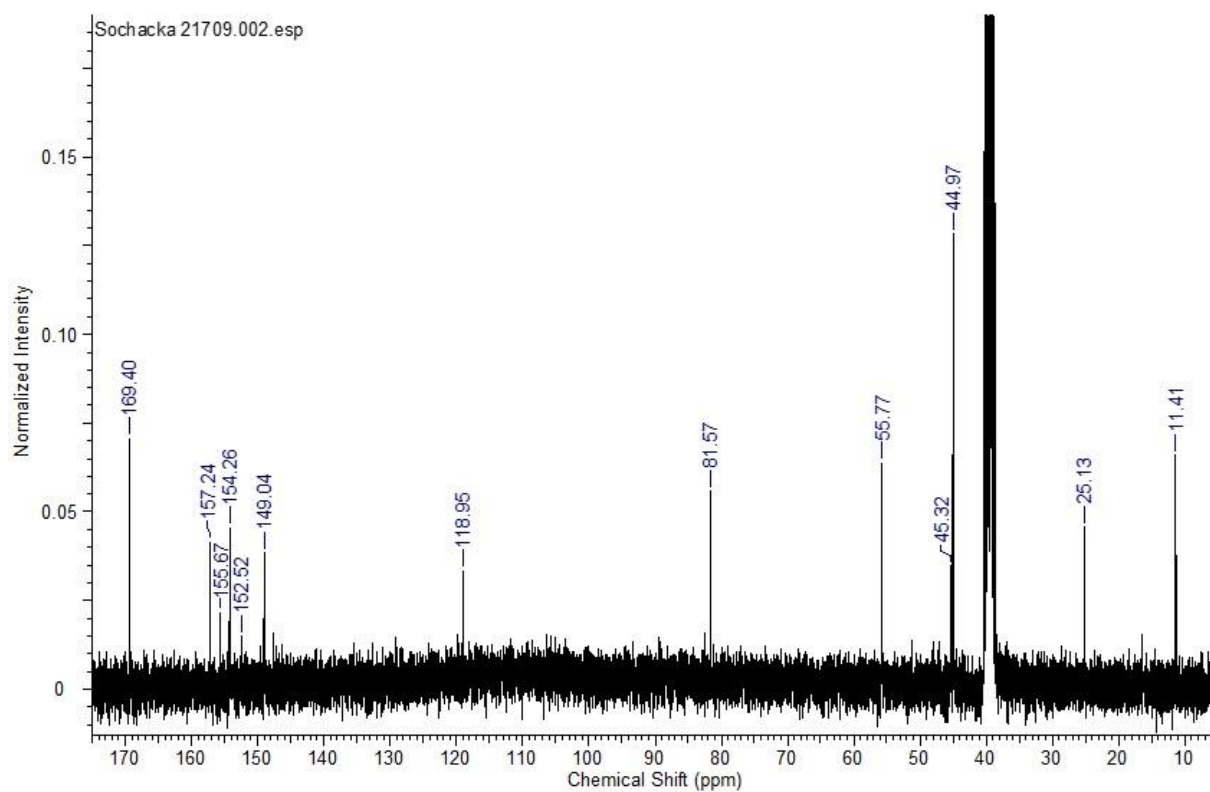

**Figure S34.**  $^{13}\text{C}$ -NMR spectrum of the compound **3g** in  $\text{DMSO-}d_6$ .

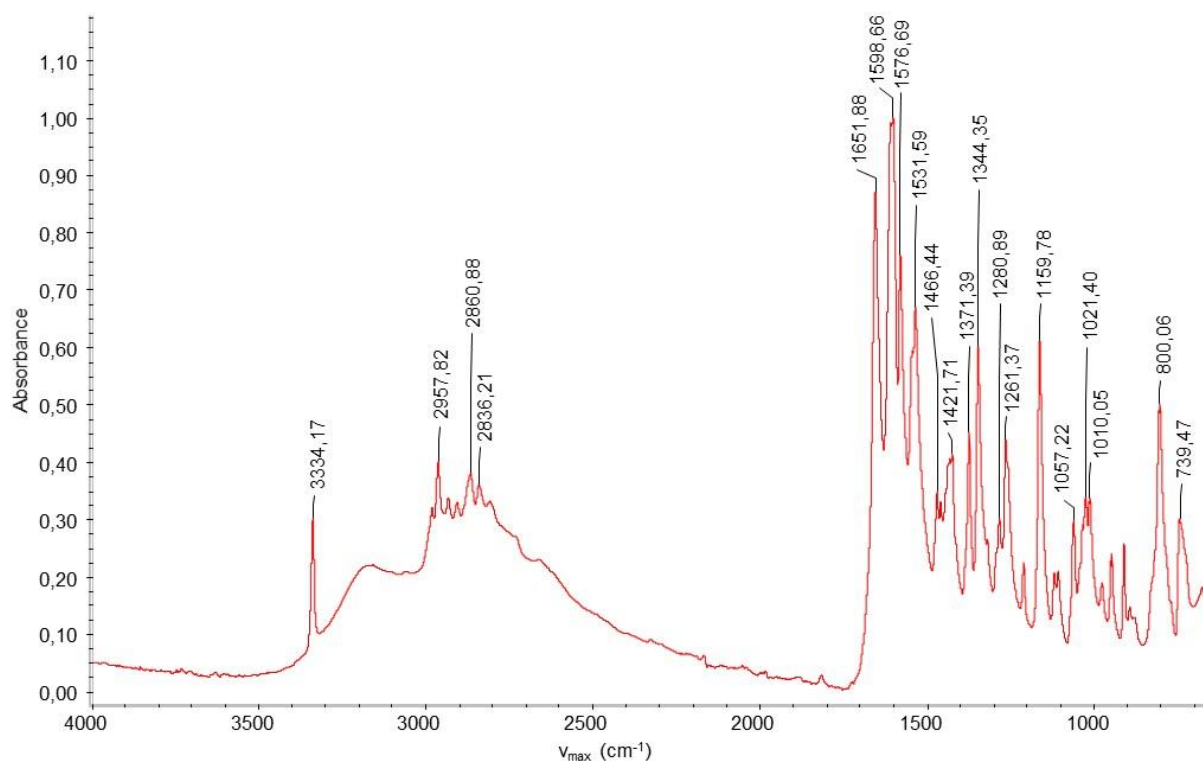

**Figure S35.** ATR-FTIR spectrum of the compound **3g**.

## Visualizations of Nuclear magnetic resonance (NMR) and Infrared (IR) spectra of the compound **3h**

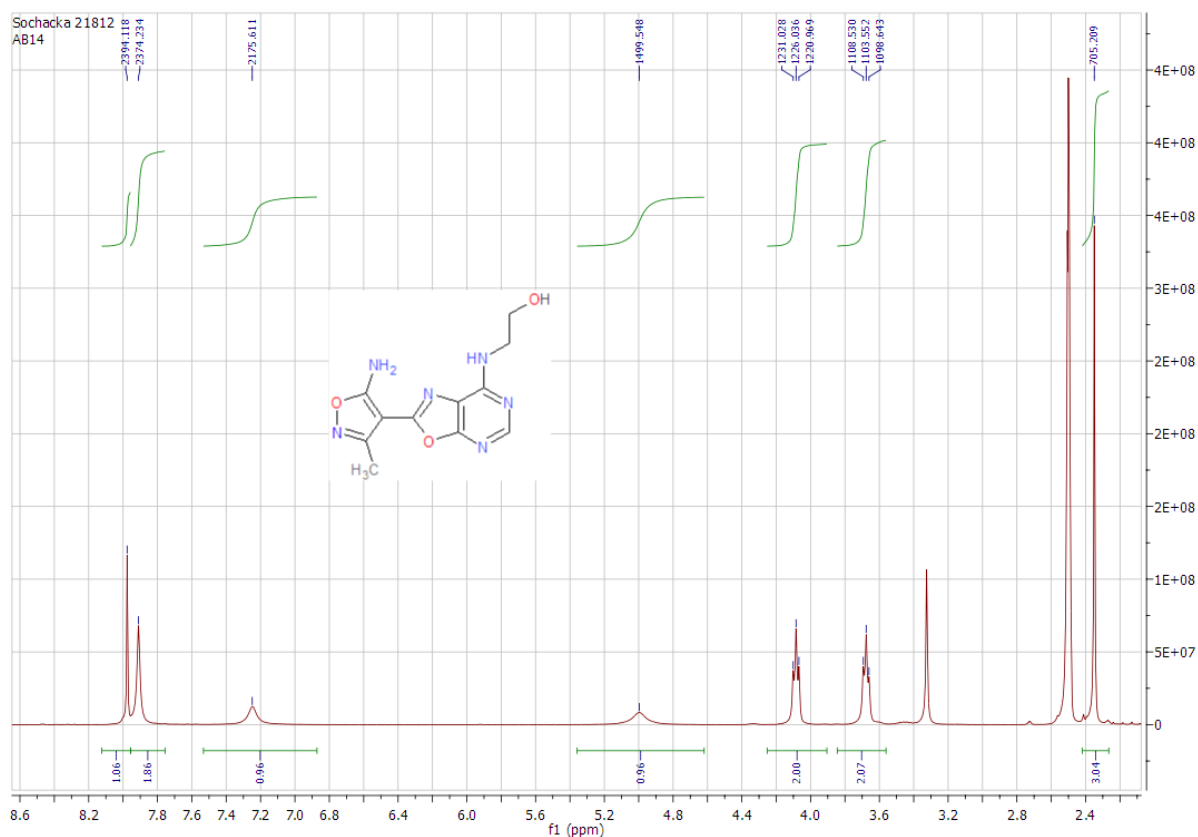

**Figure S36.** <sup>1</sup>H-NMR spectrum of the compound **3h** in DMSO-*d*<sub>6</sub>.

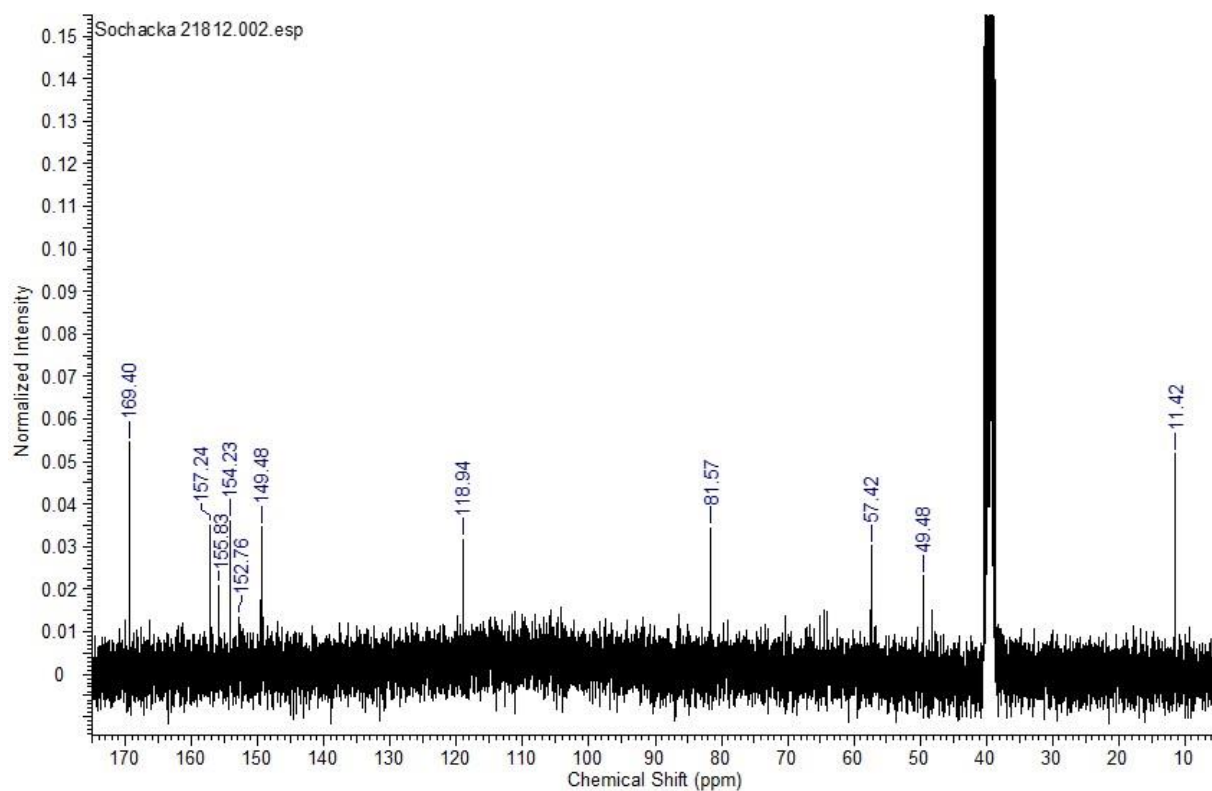

**Figure S37.** <sup>13</sup>C-NMR spectrum of the compound **3h** in DMSO-*d*<sub>6</sub>.



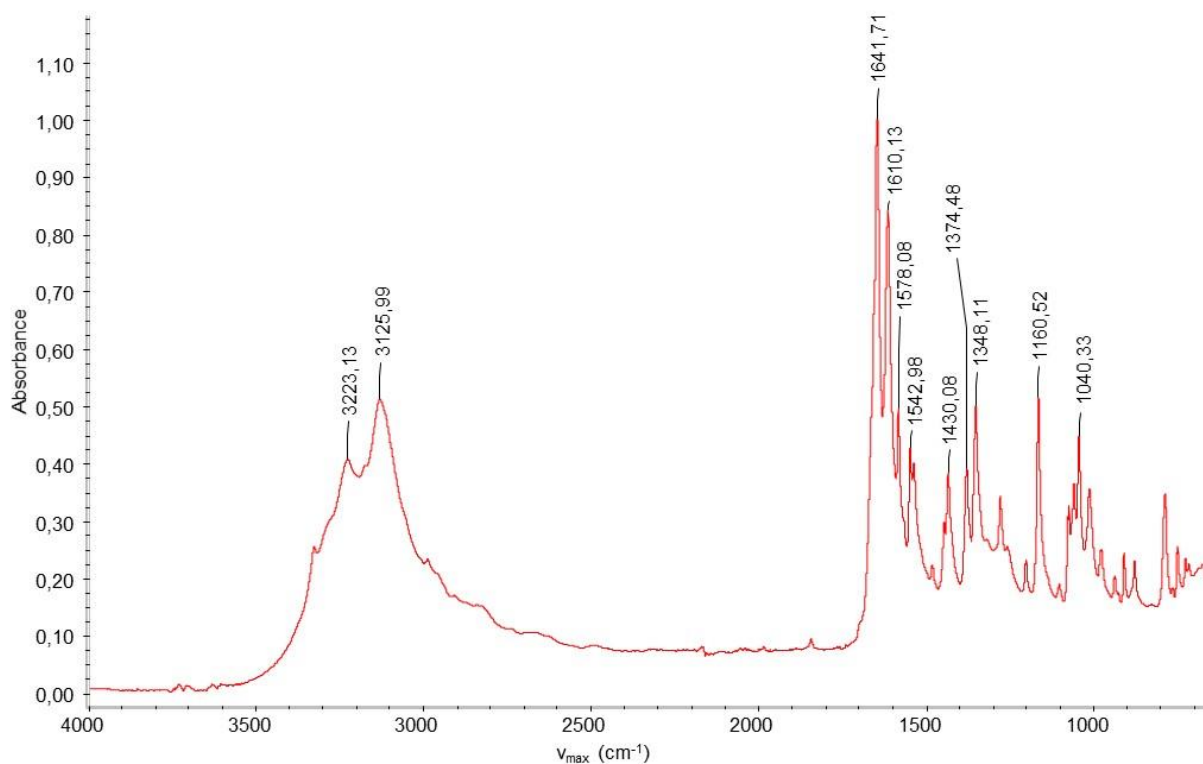

**Figure S38.** ATR-FTIR spectrum of the compound **3h**.

### Visualizations of Nuclear magnetic resonance (NMR) and Infrared (IR) spectra of the compound **3i**

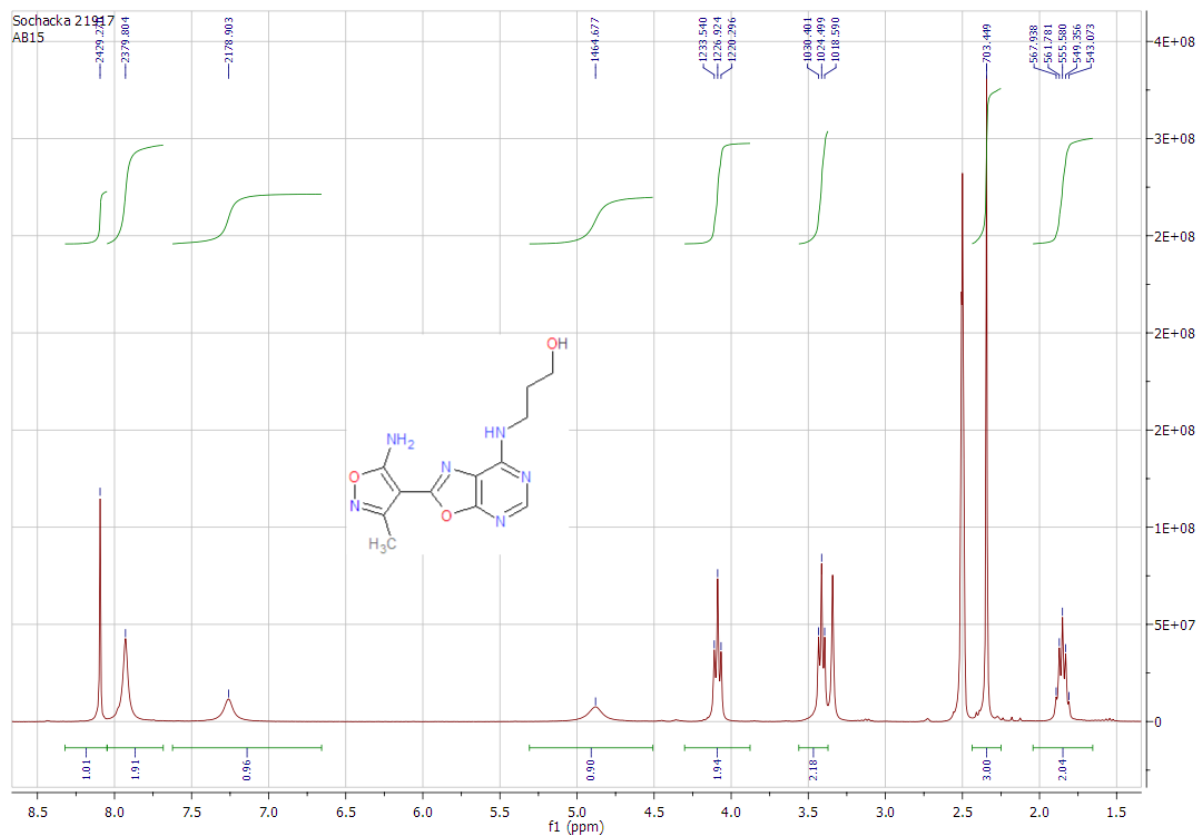

**Figure S39.**  $^1\text{H}$ -NMR spectrum of the compound **3i** in  $\text{DMSO}-d_6$ .

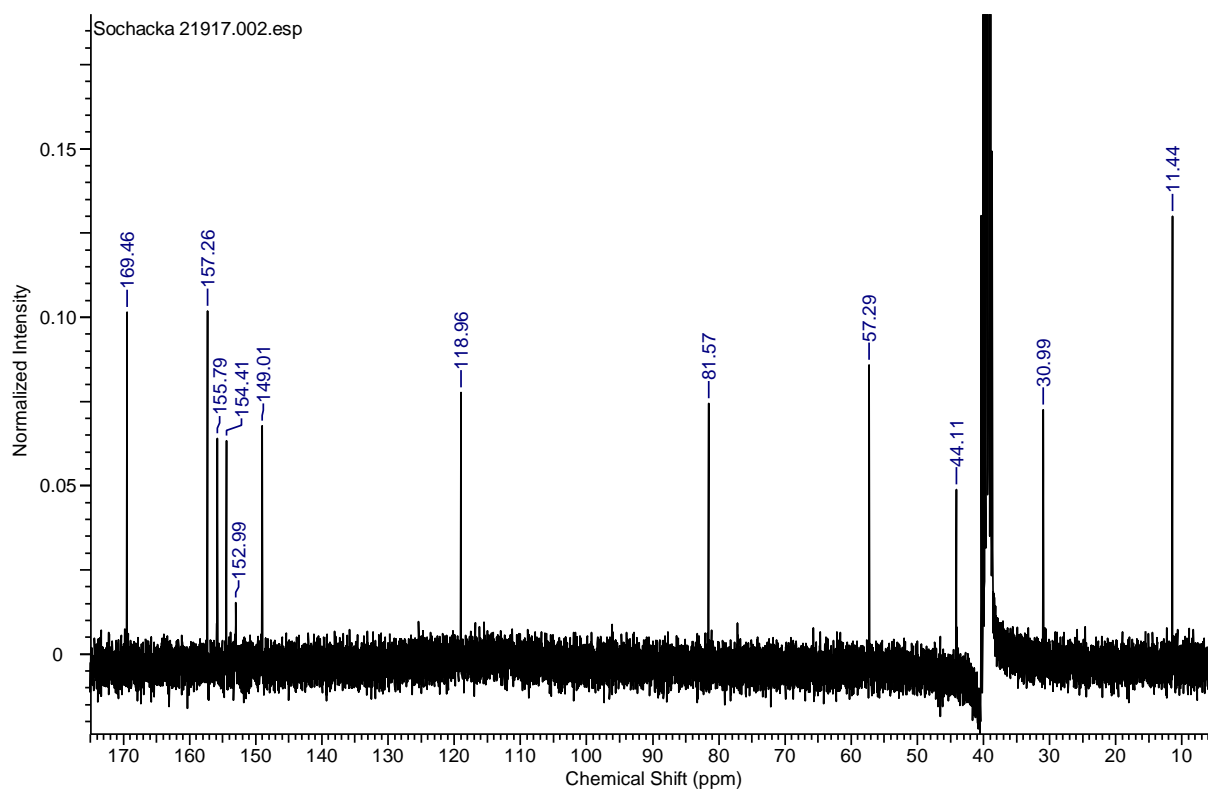

**Figure S40.**  $^{13}\text{C}$ -NMR spectrum of the compound **3i** in  $\text{DMSO-}d_6$ .

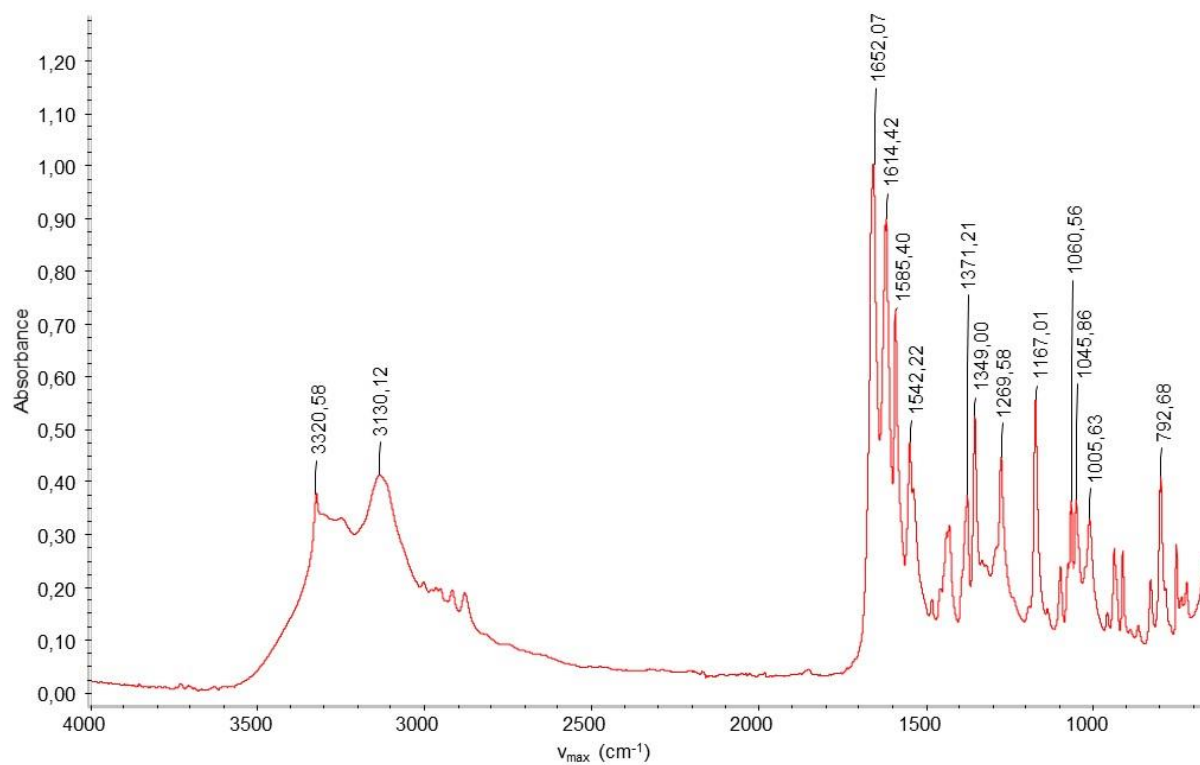

**Figure S41.** ATR-FTIR spectrum of the compound **3i**.

## Visualizations of Nuclear magnetic resonance (NMR) and Infrared (IR) spectra of the compound **3j**

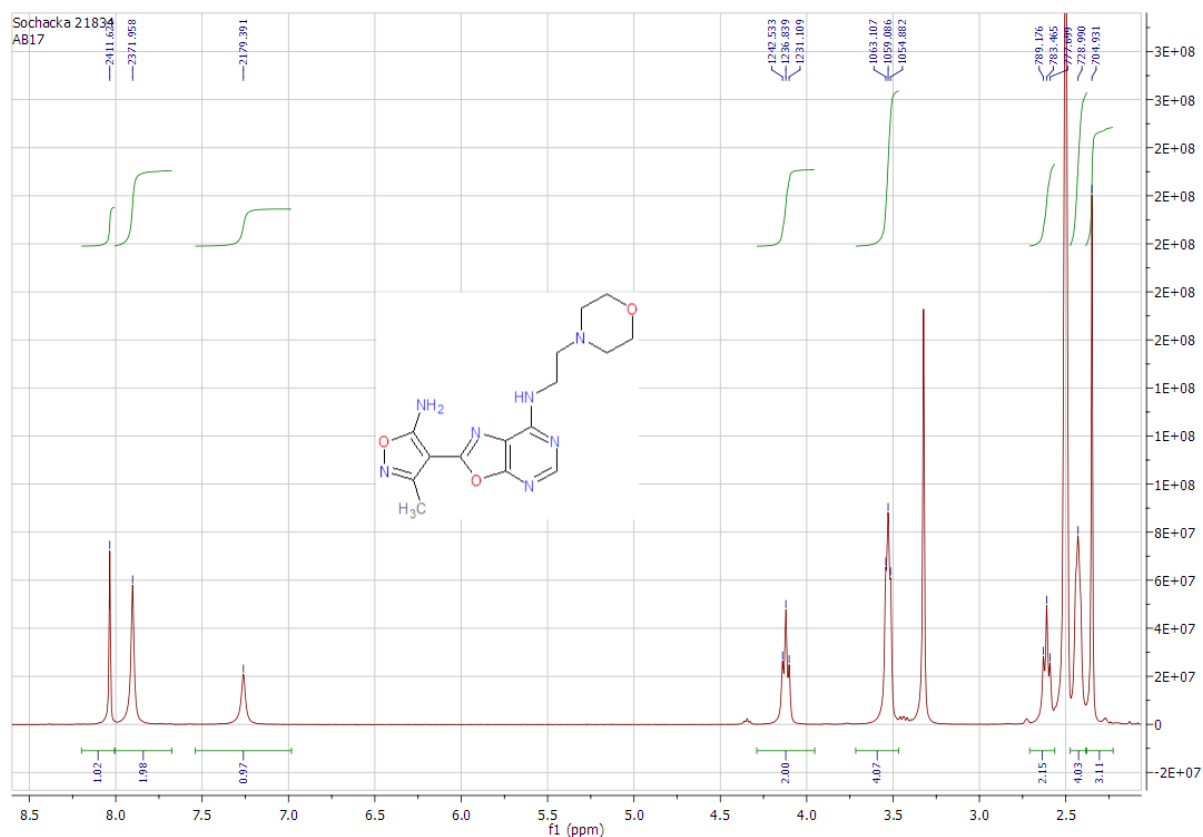

**Figure S42.** <sup>1</sup>H-NMR spectrum of the compound **3j** in DMSO-*d*<sub>6</sub>.

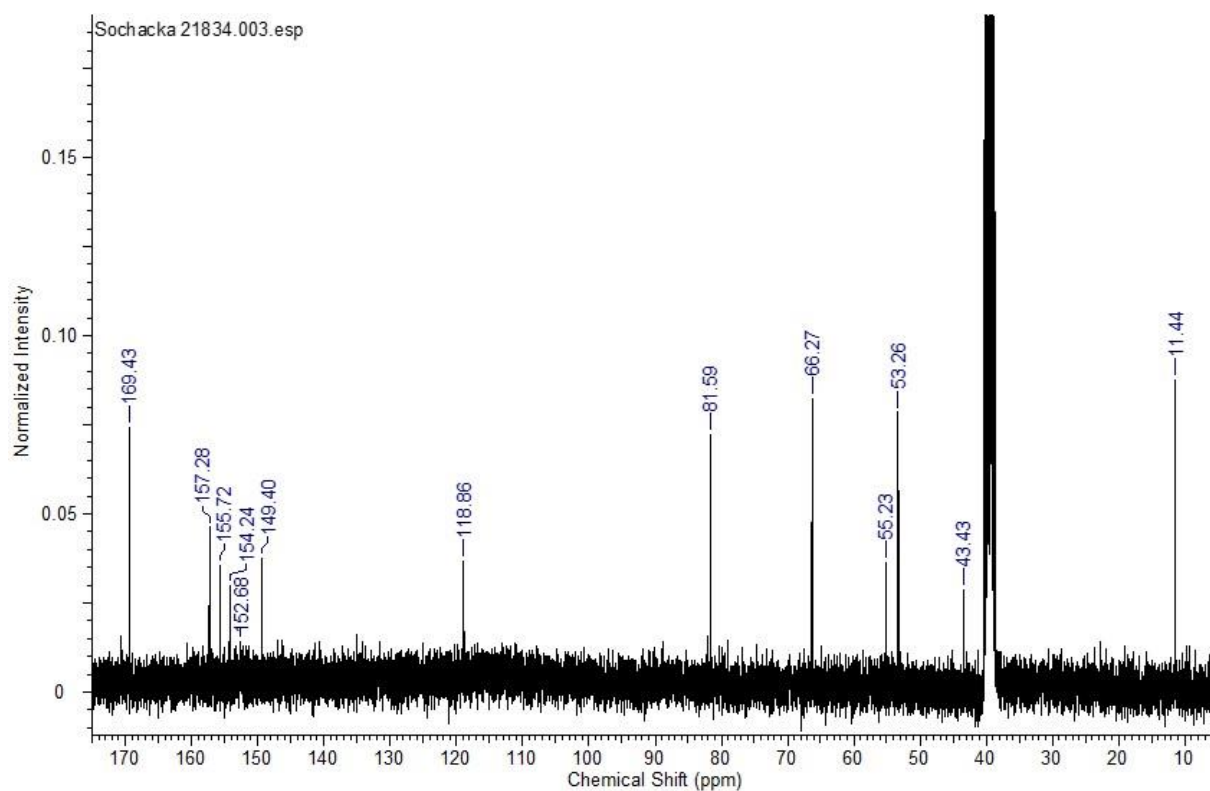

**Figure S43.** <sup>13</sup>C-NMR spectrum of the compound **3j** in DMSO-*d*<sub>6</sub>.

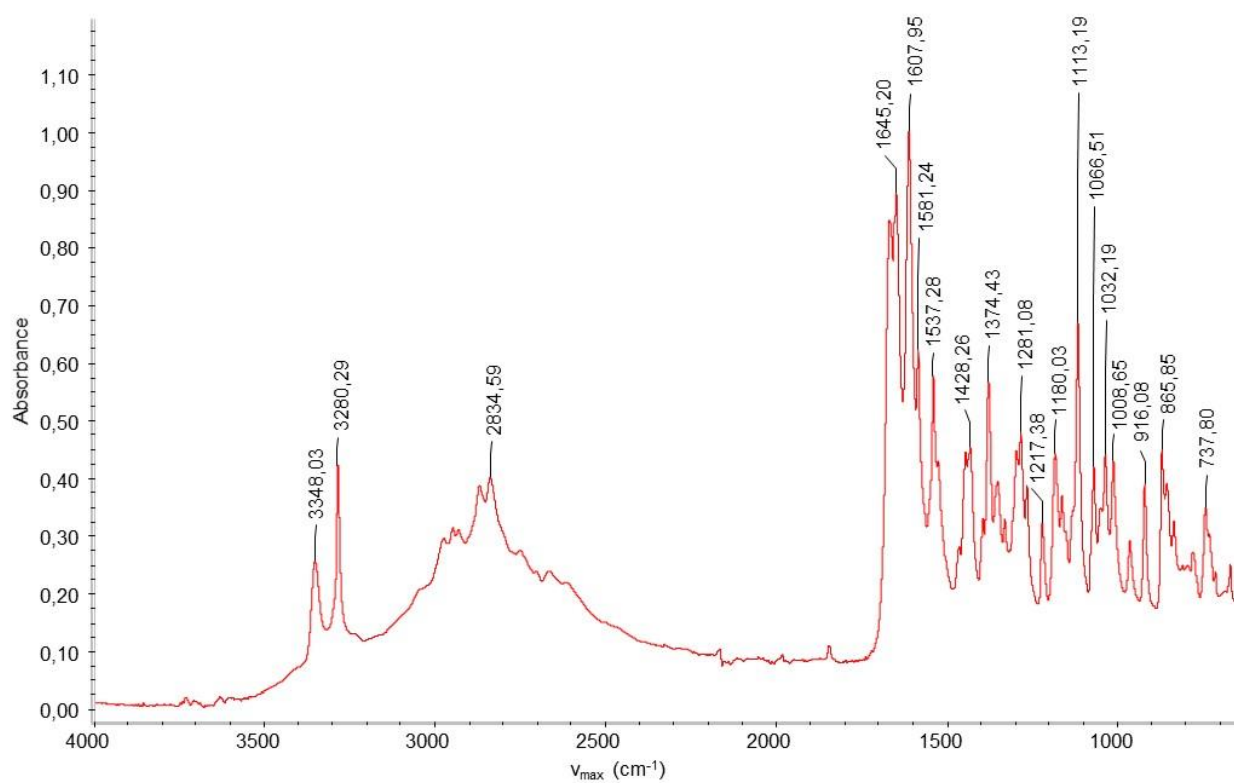

**Figure S44.** ATR-FTIR spectrum of the compound **3j**.

## BIOLOGY

**Table S14.** P-glycoprotein inhibitory ability of compounds **3a**, **3e-f** and **3j**.

| Compound  | Concentration [μM] |      |      |      |      |      |      |      |      |      |
|-----------|--------------------|------|------|------|------|------|------|------|------|------|
|           | 1                  |      | 2    |      | 5    |      | 10   |      | 20   |      |
|           | E/E <sub>0</sub>   |      |      |      |      |      |      |      |      |      |
|           | mean               | SD   | mean | SD   | mean | SD   | mean | SD   | mean | SD   |
| 3a        | 0.99               | 0.02 | 0.99 | 0.04 | 0.99 | 0.02 | 1.00 | 0.03 | 1.00 | 0.03 |
| 3e        | 1.12               | 0.11 | 1.19 | 0.07 | 1.21 | 0.07 | 1.24 | 0.05 | 1.21 | 0.09 |
| 3f        | 1.13               | 0.09 | 1.17 | 0.08 | 1.20 | 0.10 | 1.22 | 0.03 | 1.24 | 0.05 |
| 3g        | 1.15               | 0.07 | 1.23 | 0.07 | 1.25 | 0.04 | 1.25 | 0.09 | 1.24 | 0.11 |
| 3j        | 1.09               | 0.02 | 1.10 | 0.02 | 1.20 | 0.04 | 1.23 | 0.02 | 1.26 | 0.06 |
| Cisplatin | 1.02               | 0.02 | 1.04 | 0.03 | 1.05 | 0.02 | 1.05 | 0.02 | 1.07 | 0.02 |
| 5-FU      | 1.04               | 0.02 | 1.06 | 0.03 | 1.11 | 0.02 | 1.10 | 0.03 | 1.09 | 0.03 |

**Table S15.** Pro-apoptotic activity of compounds **3a**, **3e-f** and **3j**.

| Compound         | Concentration [ $\mu$ M] | mean  | apoptosis |       | late apoptosis |       | necrosis |       |
|------------------|--------------------------|-------|-----------|-------|----------------|-------|----------|-------|
|                  |                          | life  | mean      | SD    | mean           | SD    | mean     | SD    |
| <b>Control</b>   | -                        | 94.78 | 3.91      | 0.56  | 1.16           | 0.74  | 0.15     | 0.18  |
| <b>3a</b>        | <b>1</b>                 | 77.51 | 6.89      | 1.21  | 11.16          | 1.97  | 4.43     | 0.70  |
|                  | <b>2</b>                 | 74.42 | 5.35      | 7.37  | 11.15          | 3.30  | 9.07     | 4.07  |
|                  | <b>5</b>                 | 76.34 | 9.38      | 1.22  | 11.51          | 1.50  | 2.76     | 0.87  |
|                  | <b>10</b>                | 71.40 | 10.99     | 1.91  | 12.07          | 2.43  | 5.55     | 2.06  |
| <b>3e</b>        | <b>1</b>                 | 78.17 | 6.20      | 1.39  | 11.11          | 0.81  | 4.53     | 1.29  |
|                  | <b>2</b>                 | 73.80 | 4.33      | 1.88  | 12.44          | 0.92  | 9.43     | 1.22  |
|                  | <b>5</b>                 | 66.07 | 5.40      | 2.21  | 18.31          | 0.79  | 10.22    | 1.71  |
|                  | <b>10</b>                | 52.63 | 4.05      | 2.24  | 22.59          | 1.26  | 20.74    | 5.00  |
| <b>3g</b>        | <b>1</b>                 | 76.90 | 3.74      | 2.16  | 8.08           | 0.36  | 11.28    | 1.63  |
|                  | <b>2</b>                 | 74.65 | 9.72      | 11.22 | 9.30           | 2.90  | 6.34     | 5.44  |
|                  | <b>5</b>                 | 23.81 | 51.54     | 3.15  | 23.48          | 2.25  | 1.18     | 1.67  |
|                  | <b>10</b>                | 24.62 | 45.24     | 15.02 | 29.23          | 14.73 | 0.90     | 22.04 |
| <b>3f</b>        | <b>1</b>                 | 89.62 | 7.07      | 3.36  | 3.15           | 2.06  | 0.16     | 1.13  |
|                  | <b>2</b>                 | 83.82 | 3.08      | 7.55  | 7.34           | 1.44  | 5.76     | 3.77  |
|                  | <b>5</b>                 | 74.77 | 6.76      | 1.87  | 12.74          | 2.70  | 5.73     | 0.91  |
|                  | <b>10</b>                | 72.06 | 18.64     | 19.26 | 6.51           | 19.20 | 2.78     | 5.22  |
| <b>3j</b>        | <b>1</b>                 | 57.30 | 5.45      | 2.71  | 29.25          | 1.02  | 8.01     | 3.18  |
|                  | <b>2</b>                 | 61.47 | 8.18      | 7.55  | 26.44          | 0.71  | 3.92     | 6.70  |
|                  | <b>5</b>                 | 57.69 | 8.28      | 5.60  | 30.59          | 7.48  | 3.45     | 10.76 |
|                  | <b>10</b>                | 52.76 | 1.34      | 2.93  | 13.55          | 0.42  | 32.35    | 0.63  |
| <b>Cisplatin</b> | <b>1</b>                 | 50.30 | 4.45      | 2.16  | 26.25          | 0.79  | 7.81     | 0.23  |
|                  | <b>2</b>                 | 52.47 | 7.18      | 7.55  | 24.44          | 2.70  | 4.42     | 1.67  |
|                  | <b>5</b>                 | 59.69 | 6.28      | 3.15  | 29.59          | 1.63  | 3.95     | 0.36  |
|                  | <b>10</b>                | 48.76 | 2.34      | 15.02 | 16.55          | 2.90  | 32.35    | 1.63  |
| <b>5-FU</b>      | <b>1</b>                 | 59.77 | 7.92      | 2.24  | 31.72          | 1.63  | 10.48    | 5.00  |
|                  | <b>2</b>                 | 63.94 | 10.65     | 11.22 | 28.91          | 2.90  | 8.86     | 5.44  |
|                  | <b>5</b>                 | 60.16 | 10.75     | 7.55  | 33.06          | 2.06  | 8.39     | 1.13  |
|                  | <b>10</b>                | 55.23 | 3.81      | 19.26 | 16.02          | 1.63  | 34.82    | 14.73 |

**Table S16.** Effect on cell migration of compounds **3a**, **3e-f** and **3j**.

| Compound                     | Concentration [ $\mu$ M] |         |            |         |            |         |            |         |
|------------------------------|--------------------------|---------|------------|---------|------------|---------|------------|---------|
|                              | <b>10</b>                |         | <b>25</b>  |         | <b>50</b>  |         | <b>100</b> |         |
|                              | mean                     | SD      | mean       | SD      | mean       | SD      | mean       | SD      |
| <b>3g</b>                    | 180844                   | 11569.6 | 218581.6   | 4012.6  | 245687.8   | 8957.5  | 314566.8   | 15735.5 |
| <b>Cisplatin</b>             | 171562.8                 | 8085.4  | 209621     | 13992.6 | 216006.4   | 6219.8  | 253653.8   | 10770.3 |
| <b>5-FU</b>                  | 155098.248               | 13405.5 | 192391.405 | 11490.6 | 198312.887 | 6719.7  | 282974.4   | 8580.6  |
| <b>Control</b>               |                          |         | mean       |         |            | SD      |            |         |
|                              |                          |         | 155558.2   |         |            | 35476.2 |            |         |
| <b>Control T<sub>0</sub></b> |                          |         | mean       |         |            | SD      |            |         |
|                              |                          |         | 544366.45  |         |            | 28332.4 |            |         |

## MOLECULAR DOCKING

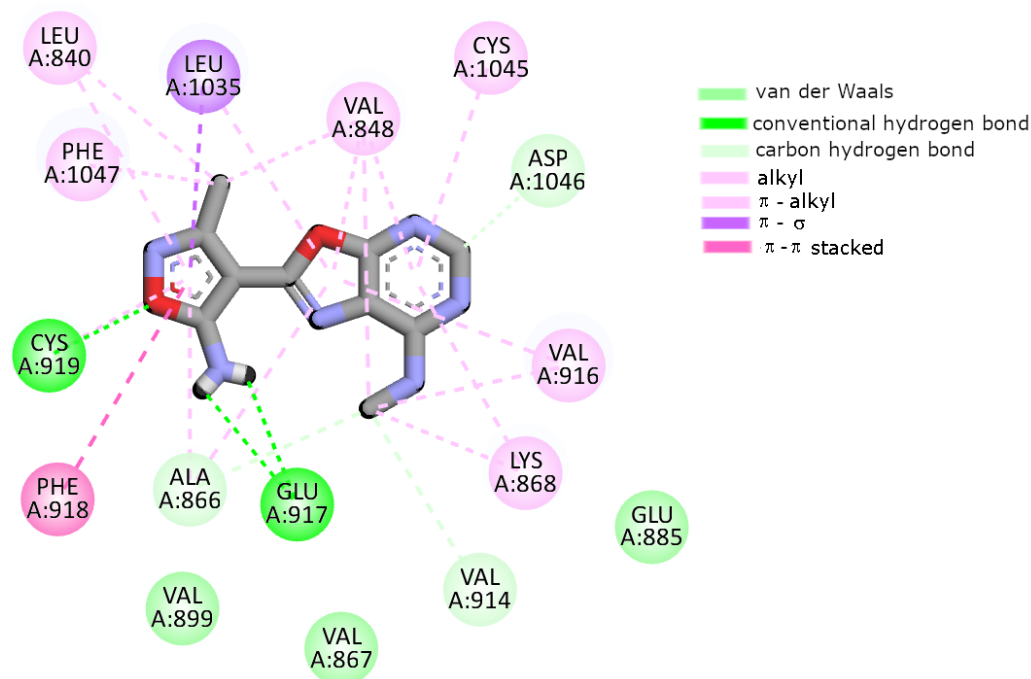

**Figure S45.** The possible intermolecular interactions the active site of VEGFR2 (2D representation) with **3a**.

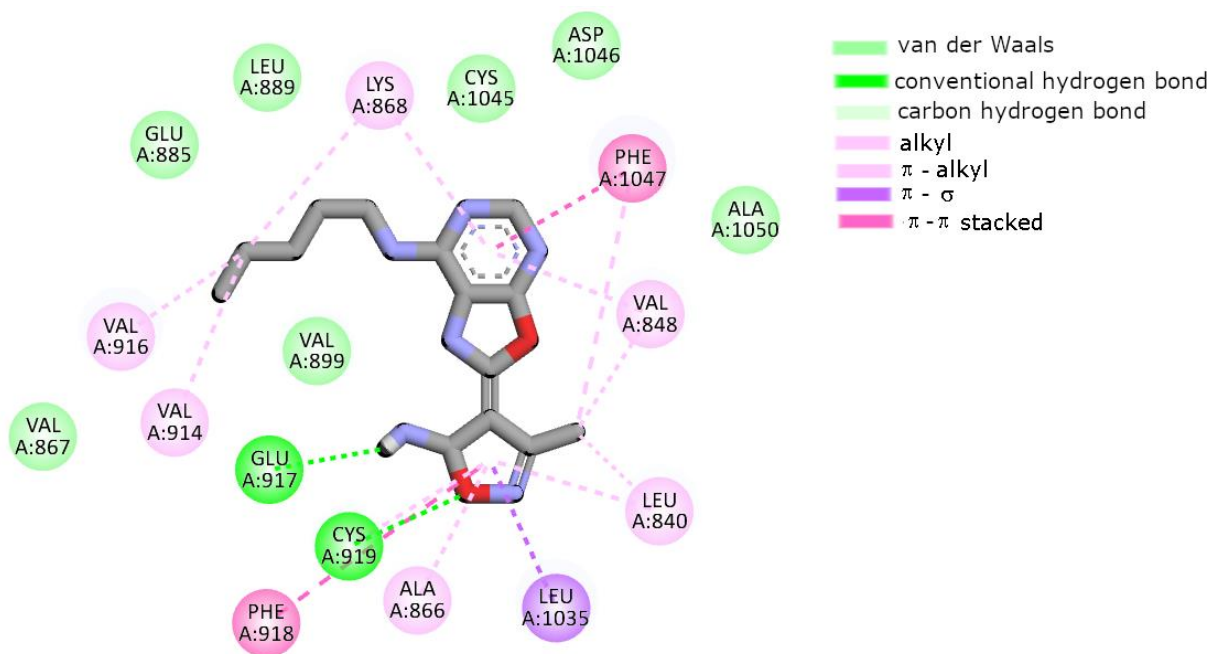

**Figure S46.** The possible intermolecular interactions the active site of VEGFR2 (2D representation) with **3e**.

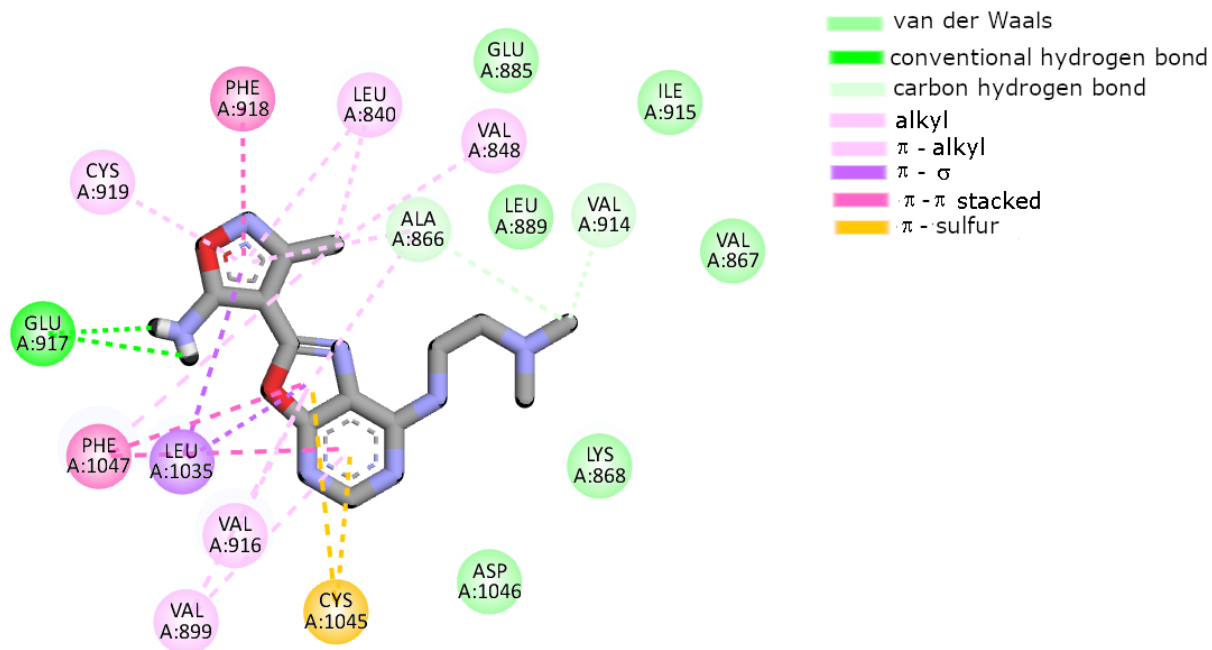

**Figure S47.** The possible intermolecular interactions the active site of VEGFR2 (2D representation) with **3f**.

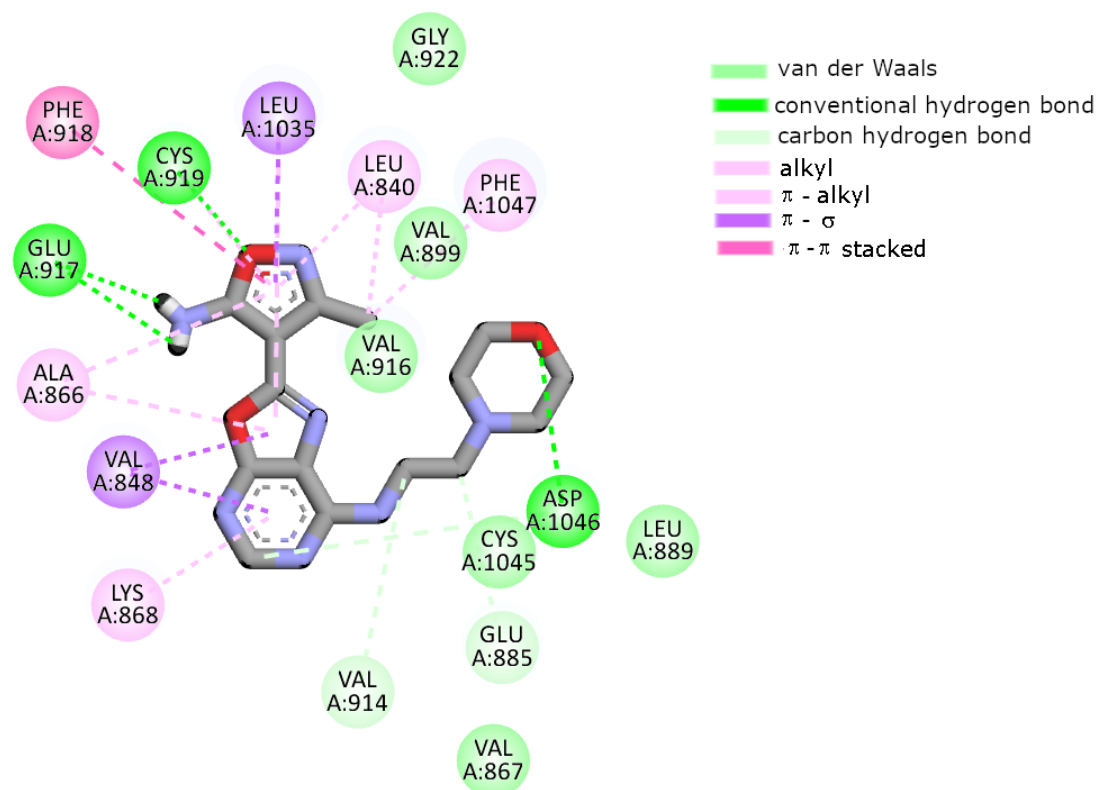

**Figure S48.** The possible intermolecular interactions the active site of VEGFR2 (2D representation) with **3j**.



## PHYSICOCHEMICAL PROPERTIES, PHARMACOKINETICS AND ADME ACTIVITY

**Table S17.** Physicochemical properties of compounds **3a**, **3e-f** and **3j**.

| Parameter                                                               | Compound |        |        |        |        |
|-------------------------------------------------------------------------|----------|--------|--------|--------|--------|
|                                                                         | 3a       | 3e     | 3f     | 3g     | 3j     |
| MW (molecular weight)<br>Optimal 100-600                                | 239.03   | 304.16 | 303.14 | 317.16 | 345.13 |
| nHA (number of hydrogen<br>bond acceptors) Optimal 0 -12                | 8        | 8      | 9      | 9      | 10     |
| nHD (number of hydrogen<br>bond donors) Optimal 0-7                     | 3        | 4      | 3      | 3      | 3      |
| TPSA<br>(topological polar surface area)<br>Optimal 0-140               | 119.85   | 115.23 | 123.09 | 123.9  | 132.32 |
| nRot (number of rotatable<br>bonds) Optimal 0-11                        | 1        | 6      | 4      | 5      | 4      |
| nRing (number of rings)<br>Optimal 0-6                                  | 3        | 3      | 3      | 3      | 4      |
| nHet (number of heteroatoms)<br>Optimal 1-15                            | 8        | 8      | 9      | 9      | 10     |
| logP (Log of the octanol/water<br>partition coefficient) Optimal<br>0-3 | -2.23    | 0.37   | -0.47  | -0.09  | -0.30  |
| logD (logP at physiological<br>pH) Optimal 1-3                          | -0.451   | 2.52   | 0.43   | 0.46   | 0.94   |

**Table S18.** Medicinal chemistry of compounds **3a**, **3e-f** and **3j**.

| Parameter                                                                                                                                     | Compound |      |      |      |      |
|-----------------------------------------------------------------------------------------------------------------------------------------------|----------|------|------|------|------|
|                                                                                                                                               | 3a       | 3e   | 3f   | 3g   | 3j   |
| QED (measure of drug-likenes<br>based on the concept of<br>desirability; attractive > 0.67,<br>unattractive 0.49-0.67, too<br>complex < 0.34) | 0.54     | 0.61 | 0.64 | 0.60 | 0.61 |

|                                                                                                                                                                                       |          |          |          |          |          |
|---------------------------------------------------------------------------------------------------------------------------------------------------------------------------------------|----------|----------|----------|----------|----------|
| SAscore (synthetic accessibility score is designed to estimate ease of synthesis of drug-like molecules; $\geq 6$ – difficult, $< 6$ -easy to synthesize)                             | 5.801    | 4.43     | 4.05     | 3.96     | 3.81     |
| Fsp3 (number of sp <sup>3</sup> hybridized carbons / total carbon count, correlating with melting point and solubility; $\geq 0.42$ is considered a suitable value)                   | 0.0      | 0.5      | 0.38     | 0.43     | 0.46     |
| Lipinski Rule (MW $\leq 500$ ; logP $\leq 5$ ; Hacc $\leq 10$ ; Hdon $\leq 5$ ; if two properties are out of range, a poor absorption or permeability is possible, one is acceptable) | accepted | accepted | accepted | accepted | accepted |
| Pfizer Rule (compounds with a high log P ( $>3$ ) and low TPSA ( $<75$ ) are likely to be toxic)                                                                                      | accepted | accepted | accepted | accepted | accepted |
| GSK Rule (MW $\leq 400$ ; logP $\leq 4$ ; compounds satisfying the GSK rule may have a more favorable ADMET profile)                                                                  | accepted | accepted | accepted | accepted | accepted |

**Table S19.** Absorption and distribution of compounds **3a**, **3e-f** and **3j**.

| Parameter                                                                                                                                                                         | Compound |       |       |       |       |
|-----------------------------------------------------------------------------------------------------------------------------------------------------------------------------------|----------|-------|-------|-------|-------|
|                                                                                                                                                                                   | 3a       | 3e    | 3f    | 3g    | 3j    |
| HIA (Human Intestinal Absorption; Category 1: HIA+ (HIA $< 30\%$ ); Category 0: HIA- (HIA $< 30\%$ ); The output value is the probability of being HIA+)                          | 0.016    | 0.399 | 0.019 | 0.019 | 0.026 |
| F 20% (20% Bioavailability; Category 1: F20%+ (bioavailability $< 20\%$ ); Category 0: F20%- (bioavailability $\geq 20\%$ ); The output value is the probability of being F20% +) | 0.019    | 0.004 | 0.007 | 0.007 | 0.096 |

|                                                                                                                                                                                          |        |        |        |        |        |
|------------------------------------------------------------------------------------------------------------------------------------------------------------------------------------------|--------|--------|--------|--------|--------|
| F 30% (30% Bioavailability;<br>Category 1: F30%+<br>(bioavailability < 30%);<br>Category 0: F30%-<br>(bioavailability ≥ 30%); The<br>output value is the probability<br>of being F30% +) | 0.011  | 0.548  | 0.002  | 0.002  | 0.044  |
| PPB (Plasma Protein Binding;<br>Optimal < 90%. Drugs with<br>high protein-bound may have a<br>low therapeutic index)                                                                     | 93.67% | 61.04% | 77.59% | 75.57% | 84.10% |
| VD (Volume Distribution;<br>Optimal 0.04-20L/kg)                                                                                                                                         | 0.19   | 1.3    | 1.8    | 1.71   | 1.45   |
| BBB Penetration (Blood-Brain<br>Barrier Penetration Category;<br>1: BBB+; Category 0: BBB-;<br>The output value is the<br>probability of being BBB+)                                     | 0.09   | 0.47   | 0.49   | 0.441  | 0.398  |

**Table S20.** Metabolism and excretion of compounds **3a**, **3e-f** and **3j**.

| Parameter                                                                                                            | Compound |       |       |       |       |
|----------------------------------------------------------------------------------------------------------------------|----------|-------|-------|-------|-------|
|                                                                                                                      | 3a       | 3e    | 3f    | 3g    | 3j    |
| CYP1A2 inhibitor                                                                                                     | NO       | YES   | YES   | YES   | YES   |
| CYP2C19 inhibitor                                                                                                    | NO       | NO    | NO    | NO    | NO    |
| CYP2C9 inhibitor                                                                                                     | NO       | NO    | NO    | NO    | NO    |
| CYP2D6 inhibitor                                                                                                     | NO       | NO    | NO    | NO    | NO    |
| CYP3A4 inhibitor                                                                                                     | NO       | YES   | YES   | YES   | YES   |
| CL Clearance (High: >15<br>mL/min/kg; moderate: 5-15<br>mL/min/kg; low)                                              | 2.05     | 2.19  | 6.543 | 6.618 | 6.87  |
| T 1/2Category (1: long half-<br>life; Category 0: short half-life;<br>long half-life: >3h; short half-<br>life: <3h) | 0.84     | 0.723 | 0.77  | 0.742 | 0.557 |

**Table S21.** Calculated LogP (Decimal logarithm of the n-octanol/water partition coefficient) of the compounds series **3a-j**.

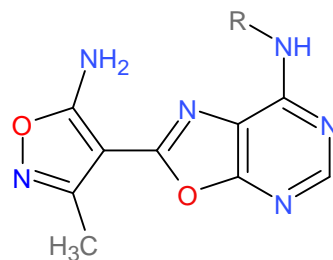

the compound series **3a-j**

| Compound                       | Calculated LogP                           |                                                           |                                                |                                                 |                                                              |
|--------------------------------|-------------------------------------------|-----------------------------------------------------------|------------------------------------------------|-------------------------------------------------|--------------------------------------------------------------|
|                                | Method1<br>with<br>ALOGPS 2.1<br>software | Method2<br>with<br>MarvinSketch<br>(ChemAxon<br>software) | Method3<br>ChemSketch<br>(ACDLabs<br>software) | Method4<br>with<br>BIOVIA Draw<br>2019 software | Method5 <sup>a</sup><br>with<br>ADMETlab<br><b>LogP/LogD</b> |
| <b>3a, R=Me</b>                | 1.02                                      | 0.02                                                      | 1.14±1.41                                      | 0.1635                                          | 1.205/1.284                                                  |
| <b>3b, R=Et</b>                | 1.64                                      | 0.37                                                      | 1.67±1.41                                      | 0.5123                                          | 1.595/1.467                                                  |
| <b>3c, R=n-Pr</b>              | 1.91                                      | 0.83                                                      | 2.20±1.41                                      | 1.036                                           | 1.985/1.781                                                  |
| <b>3d, R=n-Bu</b>              | 2.33                                      | 1.23                                                      | 2.73±1.41                                      | 1.4922                                          | 2.375/1.936                                                  |
| <b>3e, R=n-pentyl)</b>         | 2.74                                      | 1.63                                                      | 3.26±1.41                                      | 1.9484                                          | 2.766/2.382                                                  |
| <b>3f, R=Me<sub>2</sub>NEt</b> | 1.02                                      | 0.00                                                      | 0.98±1.41                                      | 0.3022                                          | 1.137/1.379                                                  |
| <b>3g, R=Me<sub>2</sub>NPr</b> | <b>1.35</b>                               | <b>0.05</b>                                               | <b>1.32±1.41</b>                               | <b>0.3646</b>                                   | <b>1.527/1.556</b>                                           |

|                                      |             |              |                  |                |                  |
|--------------------------------------|-------------|--------------|------------------|----------------|------------------|
| <b>3h, R=HOEt</b>                    | 0.37        | -0.72        | 0.36±1.43        | -0.3759        | 0.568/0.211      |
| <b>3i, R=HOPr</b>                    | 0.65        | -0.67        | 0.11±1.43        | -0.3135        | 0.958/1.093      |
| <b>3j, R=2-(morpholin-4-yl)ethyl</b> | <b>0.73</b> | <b>-0.34</b> | <b>0.59±1.42</b> | <b>-0.0101</b> | <b>0.908/1.3</b> |

<sup>a</sup> **Method5** - Wildman-Crippen LogP value. S. A. Wildman and G. M. Crippen, J CHEM INF COMP SCI, 1999, 39(5): 868-873; For LogD – “Methods and principles in medicinal chemistry “, 18 (pp. 21–45). Weinheim: Wiley-VCH.
